## **Expression of a miRNA targeting mutated SOD1 in astrocytes induces motoneuron plasticity and improves neuromuscular function in ALS mice**

Rochat C.<sup>1</sup>, Bernard-Marissal N.<sup>1,6</sup>, Pradervand S.<sup>3</sup>, Perrin F.E.<sup>4</sup>, Raoul C.<sup>5</sup>, Aebischer P.<sup>1</sup>, Schneider B.L.<sup>1,2\*</sup>

<sup>1</sup> Brain Mind Institute, Ecole Polytechnique Fédérale de Lausanne (EPFL), 1015 Lausanne, Switzerland

<sup>2</sup> Bertarelli Platform for Gene Therapy, Ecole Polytechnique Fédérale de Lausanne (EPFL), Geneva, Switzerland

<sup>3</sup> Genomic Technologies Facility, University of Lausanne, Lausanne, Switzerland.

<sup>4</sup> INSERM U1198, University of Montpellier, EPHE, Place Eugène Bataillon CC105, F-34095, Montpellier, France

<sup>5</sup> The Neuroscience Institute of Montpellier, Inserm UMR1051, Univ Montpellier, Saint Eloi Hospital, Montpellier, France

<sup>6</sup> Aix Marseille Univ, INSERM, MMG, Marseille, France

\*Correspondence should be addressed to B.L.S. ([bernard.schneider@epfl.ch](mailto:bernard.schneider@epfl.ch))

Short title: miRNA gene therapy targeting astrocytes in ALS

Study was performed in Lausanne, Switzerland

Current address of corresponding author:

Bernard Schneider

EPFL SV PTECH PTBTG

Ch. des Mines 9

CH-1202 Genève

Switzerland

Email: [bernard.schneider@epfl.ch](mailto:bernard.schneider@epfl.ch)

Tel: +41 21 693 95 05

1 **Abstract**

2 In amyotrophic lateral sclerosis (ALS) caused by *SOD1* gene mutations, both cell-autonomous and  
3 non-cell-autonomous mechanisms lead to the selective degeneration of motoneurons. Here, we  
4 evaluate the therapeutic potential of gene therapy targeting mutated *SOD1* in mature astrocytes  
5 using mice expressing the mutated *SOD1*<sup>G93A</sup> protein. An AAV-gfaABC<sub>1</sub>D vector encoding an  
6 artificial microRNA is used to deliver RNA interference against mutated *SOD1* selectively in  
7 astrocytes. The treatment leads to the progressive rescue of neuromuscular junction occupancy, to  
8 the recovery of the compound muscle action potential in the *gastrocnemius* muscle, and  
9 significantly improves neuromuscular function. In the spinal cord, gene therapy targeting astrocytes  
10 protects a small pool of fast-fatigable motoneurons until disease end stage. In the *gastrocnemius*  
11 muscle of the treated *SOD1*<sup>G93A</sup> mice, the fast-twitch type IIb muscle fibers are preserved from  
12 atrophy. Axon collateral sprouting is observed together with muscle fiber type grouping indicative  
13 of denervation/re-innervation events. The transcriptome profiling of spinal cord motoneurons  
14 shows changes in the expression levels of factors regulating the dynamics of microtubules. Gene  
15 therapy delivering RNA interference against mutated *SOD1* in astrocytes provides therapeutic  
16 effects enhancing motoneuron plasticity and improving neuromuscular function in ALS mice.

17

## 1 Introduction

2 Amyotrophic Lateral Sclerosis (ALS) is a fatal neurodegenerative disease characterized by the  
3 progressive and selective loss of motoneurons (MN) in the cortex, brainstem and spinal cord.  
4 Whereas 90% of ALS cases are sporadic, the remaining 10% are familial (fALS). Pathogenic  
5 mutations in the gene encoding Cu/Zn superoxide dismutase (*SOD1*) are considered to cause  
6 20% of fALS cases <sup>1</sup>.

7 Mice overexpressing mutated *SOD1* (mSOD1) replicate the main features of ALS <sup>2</sup>. In the spinal  
8 cord, neurodegeneration follows a specific pattern, characterized by the higher vulnerability of the  
9 fast-fatigable MN, which innervate fast-twitch type IIb muscle fibers <sup>3</sup>. Importantly, non-cell-  
10 autonomous pathogenic mechanisms are also involved in MN degeneration <sup>4-6</sup>. Mutated *SOD1* has  
11 key pathogenic effects in glial cells including astrocytes, microglial cells and oligodendrocytes.  
12 Suppressing mSOD1 in these cell types modifies onset and/or progression of the disease <sup>5,7,8</sup>.

13 Diseased astrocytes have major effects on MN, both *in vitro* and *in vivo*. In co-culture systems,  
14 astrocytes derived from ALS patients or from ALS mouse models show toxic activities on MN <sup>9-11</sup>.  
15 Furthermore, infusion of culture medium conditioned by primary mouse astrocytes expressing  
16 mSOD1 is sufficient to induce MN degeneration and neuromuscular dysfunction in healthy rats <sup>12</sup>.  
17 Although the molecular cause of this toxicity remains poorly understood, some mechanisms have  
18 been proposed. Astrocytes from ALS patients and mSOD1 mice have reduced expression of  
19 *EAAT2*, which may decrease their ability to properly uptake glutamate, causing excitotoxicity in MN  
20 <sup>13</sup>. Furthermore, ALS may affect the ability of astrocytes to provide essential metabolic and trophic  
21 support to MN, for instance by lowering lactate efflux <sup>14</sup>. Because of an abnormal ratio between  
22 pro- and mature nerve growth factor in astrocytes, the p75 signaling pathway was aberrantly up-  
23 regulated in MN <sup>14</sup>. The release of transforming growth factor  $\beta$ 1 (TGF- $\beta$ 1) is up-regulated in ALS  
24 astrocytes, with possible effects on the inflammatory response and MN survival <sup>15,16</sup>. Diseased  
25 astrocytes can also produce factors that are directly toxic to MN, such as high levels of NO and  
26 interferon gamma (IFN $\gamma$ ), which may increase oxidative stress and cause MN death <sup>9,17,18</sup>. Reactive

1 astrocytes have also been shown to release lipocalin 2 (Lcn2), which is a potent mediator of  
2 neuronal toxicity<sup>19</sup>.

3 Various strategies are explored to prevent the toxic effects of diseased astrocytes in ALS, including  
4 RNA interference to lower the expression level of mSOD1 protein<sup>20-24</sup>. We previously designed an  
5 AAV9 vector combined with the gfaABC<sub>1</sub>D promoter driving expression of an artificial microRNA to  
6 knockdown human SOD1 (miR SOD1) in astrocytes<sup>25</sup>. Following intracerebroventricular (ICV)  
7 injection in neonatal *SOD1*<sup>G93A</sup> mice, this vector was found to improve the neuromuscular function  
8 and prolong animal survival.

9 Here, we used this approach in *SOD1*<sup>G93A</sup> mice to explore the neuroprotective effects of targeting  
10 astrocytes for gene therapy against mSOD1 mediated by RNA interference (RNAi). Towards  
11 disease late stage, silencing of mSOD1 led to a significant protection of the motor function,  
12 improving mouse performance in specific behavioral tests for muscle strength and motor  
13 coordination. Treated mice displayed a partial protection of the vulnerable fast-fatigable MN in the  
14 lumbar spinal cord. However, AAV-mediated targeting of astrocytes for expression of miR SOD1  
15 had most significant effects on the occupancy of the neuromuscular junctions (NMJ), which  
16 remained highly protected from ALS-induced denervation. In the *gastrocnemius* muscle, gene  
17 therapy induced a significant protection of the fast-twitch type IIb muscle fibers. Protection of the  
18 neuromuscular junctions was also revealed by events of axonal sprouting and muscle fiber  
19 clustering. To further analyze the effects of treated astrocytes on spinal cord MN and identify  
20 potential gene candidates implicated in the therapeutic response, we performed a transcriptomic  
21 analysis of MN exposed to astrocytes expressing miR SOD1. Altogether, our results show that  
22 AAV-mediated gene therapy targeting mSOD1 in astrocytes has clear effects on spinal cord MN in  
23 *SOD1*<sup>G93A</sup> mice by promoting functional re-innervation of the skeletal muscle.

24

## 1 Results

### 2 Expression of miR SOD1 in astrocytes rescues neuromuscular function in *SOD1*<sup>G93A</sup> mice

3 We assessed the effects of AAV-mediated miR SOD1 gene therapy on disease progression in  
4 *SOD1*<sup>G93A</sup> mice. Mice were ICV injected at P2 with the AAV9-gfaABC<sub>1</sub>D:GFP:miR SOD1 vector  
5 (AAV-miR SOD1) which drives expression of an artificial anti-human SOD1 miR in astrocytes<sup>25</sup>. As  
6 previously shown<sup>26</sup>, AAV9 ICV injection in neonatal mice lead to expression of GFP along the  
7 spinal cord, including the lumbar region, with similar expression levels at 65 days of age and end  
8 stage (day 153-185) (Supplemental Fig. S1). To assess neuroprotective effects of the astrocyte-  
9 specific silencing of SOD1, the treated mice were compared to *SOD1*<sup>G93A</sup> mice injected with a  
10 similar vector encoding a scramble miR sequence (AAV-miR ctrl), non-injected *SOD1*<sup>G93A</sup> mice  
11 (untreated), and wild-type (WT) littermates. Neuromuscular function was assessed along the  
12 course of the disease using electromyography and behavioral tests (Fig. 1a). Amplitude of the  
13 muscle evoked response (CMAP) was measured every week in the *triceps surae* (Fig. 1b). Until  
14 day 73, there were no significant effects of AAV-miR SOD1, as CMAP values declined to 62 ± 4.3  
15 mV in the treated mice, a value only slightly higher than in both control groups of *SOD1*<sup>G93A</sup> mice.  
16 CMAP amplitude then increased in the AAV-miR SOD1 group, to reach 88 ± 7.3 mV at day 87, and  
17 then stayed stable until day 136. In contrast, CMAP values further decreased in the AAV-miR ctrl  
18 and untreated mice. Another miR SOD1-b sequence also targeting human SOD1 showed similar  
19 effects, which are therefore not specific to the miR sequence (Supplemental Fig. S2). Muscle  
20 strength and motor coordination were evaluated with the grid and rotarod tests, respectively (Fig.  
21 1c, d). Control *SOD1*<sup>G93A</sup> mice showed a progressive loss of muscle strength detectable from day  
22 93 on (Fig. 1c). As compared to control groups, AAV-miR SOD1 significantly improved muscle  
23 strength from day 119 until end stage (Fig. 1c). In the rotarod test, the latency to fall was only  
24 marginally prolonged in the AAV-miR SOD1 treated mice, when compared to untreated controls,  
25 reaching significance only at later stages of the disease (Fig. 1d). These results indicate that  
26 silencing of mSOD1 in astrocytes promotes recovery of the neuromuscular function in *SOD1*<sup>G93A</sup>  
27 mice, mainly improving muscle strength.

1 **Expression of miR SOD1 in astrocytes protects MN in the lumbar spinal cord but has no**  
2 **effect on the inflammatory response**

3 Next, we analyzed spinal cord tissue at various time points over the disease process, from day 65  
4 (initial drop of the CMAP amplitude) until end stage. The number of choline acetyltransferase  
5 (ChAT)-positive MN was determined in the lumbar region of the spinal cord (Fig. 2a, b). At day 65,  
6 MN loss was only marginal in *SOD1<sup>G93A</sup>* mice compared to WT mice (Fig. 2b). However, the  
7 number of ChAT-positive MN was significantly decreased in all groups at day 140. At end stage,  
8 the number of surviving MN reached  $10.1 \pm 2.1$  and  $12.2 \pm 2$  MN (mean  $\pm$  SEM) per section in the  
9 AAV-miR ctrl injected and control untreated ALS mice, respectively. In the AAV-miR SOD1 treated  
10 mice however, the number of ChAT-positive MN was significantly increased ( $14.7 \pm 2.1$  MN per  
11 section) (Fig. 2b).

12 To assess if AAV-miR SOD1 could prevent astrocytic and microglial activation in the spinal cord,  
13 we measured the area of GFAP immunoreactivity and the number of Iba1-positive microglial cells  
14 on lumbar sections at day 65, 100 and 140 (Supplemental Fig. S3a-d). As expected, a significant  
15 astrocytic and microglial activation was observed in *SOD1<sup>G93A</sup>* mice, from day 100 onwards.  
16 However, there were no significant differences in the group treated with AAV-miR SOD1 as  
17 compared to control ALS mice. These results indicate that the treatment did not have any major  
18 effects on the progression of astrogliosis and microgliosis in *SOD1<sup>G93A</sup>* mice.

19 **AAV-miR SOD1 injection protects a subpopulation of MMP9 expressing MN**

20 Since all MN subtypes are not equally affected in ALS mice, we further evaluated the effects of the  
21 treatment based on the expression of MMP9, a marker highly expressed in fast-fatigable MN,  
22 which display highest vulnerability to mSOD1-induced toxicity (Fig. 2c) <sup>3,27</sup>. At day 65, the number  
23 of lumbar MN highly positive for MMP9 was still very similar to WT mice in all groups of *SOD1<sup>G93A</sup>*  
24 mice (Fig. 2d). At day 100 however, the loss of fast-fatigable MN already reached 50% and further  
25 declined until end stage, at which time point only  $1.5 \pm 0.5$  and  $2.2 \pm 0.8$  fast-fatigable MN were  
26 found per lumbar section in the untreated and AAV-miR ctrl injected mice, respectively. In the  
27 AAV-miR SOD1 treated mice, the number of MMP9-positive MN remained stable from day 100

1 onwards. At end stage, we measured  $5.1 \pm 1.3$  MN per lumbar section (mean  $\pm$  SEM), a number  
2 significantly higher than in control groups of *SOD1<sup>G93A</sup>* mice (Fig. 2d). These results show that  
3 silencing mSOD1 in astrocytes rescues a subpopulation of fast-fatigable MN with high MMP9  
4 immunoreactivity.

### 5 **Expression of miR SOD1 in astrocytes rescues neuromuscular junctions**

6 Despite the partial rescue of spinal cord MN, AAV-miR SOD1 injection induced an effective  
7 recovery of CMAP values (see Fig. 1b), which indicates that the treatment may have additional  
8 protective effects at the level of the NMJ. To address this possibility, we analyzed NMJ occupancy  
9 in the *gastrocnemius* muscle at day 65, 100, 140 and end stage. Acetylcholine receptors were  
10 stained with alpha-bungarotoxin to reveal motor endplates, and colocalization with the anti-  
11 synaptic vesicle protein 2 (SV2) marker was used to quantify NMJ occupancy (Fig. 3a). Complete  
12 overlap between the  $\alpha$ -bungarotoxin and SV2 staining accounted for the presence of a fully  
13 innervated NMJ (Fig. 3a, b). At day 65, all groups of *SOD1<sup>G93A</sup>* mice, including the group treated  
14 with AAV-miR SOD1, displayed a significant loss of fully innervated NMJ as compared to WT mice  
15 (AAV-miR SOD1:  $61 \pm 7\%$  occupancy; WT:  $94 \pm 2\%$ , mean  $\pm$  SEM) (Fig. 3b). The innervation of  
16 motor endplates further declined until end stage in ALS mice either untreated ( $13 \pm 7\%$ ) or injected  
17 with AAV-miR ctrl ( $16 \pm 5\%$ ). In the AAV-miR SOD1 treated group however, the proportion of fully  
18 innervated NMJ increased to  $84 \pm 5\%$  by 100 days, and remained significantly rescued until end  
19 stage ( $73 \pm 7\%$ ), only marginally decreased in comparison to WT mice ( $94 \pm 32\%$ ) (Fig. 3b).  
20 Therefore, injection of the AAV-miR SOD1 vector targeting astrocytes has strong neuroprotective  
21 effects on NMJ occupancy.

### 22 **Expression of miR SOD1 in astrocytes protects mainly type IIB muscle fibers from atrophy**

23 To further assess the rescue of motor units by AAV-miR SOD1 injection, we analyzed the  
24 morphology and composition of the *triceps surae* at end stage. In particular, changes in the  
25 number, size and type of muscle fibers were assessed by immunohistochemistry in the  
26 *gastrocnemius* and *plantaris* muscles at end stage. In mice, fast-twitch glycolytic type IIB muscle  
27 fibers are innervated by fast-fatigable MN, fast-twitch oxidative type IIA fibers by fatigue-resistant

1 MN, and slow-twitch oxidative type I fibers by slow MN. Some fibers display a phenotype which is  
2 intermediate between type IIA and IIB, defined as type IIX. Major fiber types were identified using  
3 specific staining for myosin heavy chain (MyHC) isoforms (Fig. 4a). Dystrophin staining was used  
4 to delineate fiber circumference and quantify the number and mean area of individual muscle fibers  
5 (Fig. 4b). As expected, there was a marked muscle atrophy in *SOD1<sup>G93A</sup>* mice either untreated or  
6 injected with the AAV-miR ctrl vector. Atrophy was most evident in the *gastrocnemius* muscle,  
7 characterized by a major loss of type IIB muscle fibers, but was less pronounced in the *plantaris*  
8 (mixed fiber types) and *soleus* (type I and IIA) muscles (Fig. 4a). Compared to WT mice, the total  
9 number of fibers in the *gastrocnemius* muscle was decreased by more than 50% in control  
10 *SOD1<sup>G93A</sup>* mice (Fig. 4c). In contrast, there was a clear protection of muscle fibers in the AAV-miR  
11 SOD1 treated mice. Both the number and the area of the type IIB fibers remained nearly  
12 unchanged in the AAV-miR SOD1 treated mice as compared to WT animals, whereas these  
13 parameters were dramatically decreased in the control groups (Fig. 4d, e). In contrast, there was  
14 no significant difference neither in the number, nor in the area of type IIA, type I and type IIX fibers  
15 across groups (Fig. 4d, e). Overall, these results indicate that AAV-miR SOD1 treatment has major  
16 protective effects against atrophy of type IIB muscle fibers, consistent with the observed protection  
17 of the fast-twitch fatigable MN in the lumbar spinal cord (Fig. 2d).

### 18 **miR SOD1 gene therapy targeted to astrocytes induces axonal sprouting and muscle fiber** 19 **type grouping**

20 The significant rescue of NMJ occupancy observed in the AAV-miR SOD1-treated group indicates  
21 that motor nerve sprouting may have occurred in the *gastrocnemius* muscle. To qualitatively  
22 assess axon sprouting events, we performed a co-staining of NMJ with  $\alpha$ -bungarotoxin, SV2 and  
23 NFM-145, a marker for axonal neurofilaments. At day 100, terminal sprouting characterized by the  
24 presence of axons extending beyond the motor endplate was indeed observed in AAV-miR treated  
25 mice (Fig. 5a), which indicates that the treatment may have induced re-innervation of vacant  
26 endplates.

27 In neurogenic muscle atrophy, muscle fiber type grouping is often observed when denervation is



1 followed by re-innervation. To assess plastic changes in the skeletal muscle, we sought to  
2 determine the level of clustering of muscle fibers by comparing WT and AAV-miR SOD1-treated  
3 ALS mice. This analysis was only possible on non-atrophied muscle tissues. While the overall  
4 number of muscle fibers was similar in both groups (see Fig. 4c), MyHC staining revealed signs of  
5 fiber-type grouping in the treated *SOD1<sup>G93A</sup>* mice. In Fig. 5b, this effect is particularly evident in the  
6 *plantaris* muscle, where different types of muscle fibers are intermingled. To quantify the clustering  
7 of type I, IIA and IIX muscle fibers, we measured the average distance between fibers from the  
8 same type (Fig. 5c) and the percentage of fibers that are adjacent to at least one other fiber from  
9 the same subtype (Fig. 5d). Both parameters revealed significant fiber grouping effects for all three  
10 fiber types in the *gastrocnemius* and *plantaris* muscles of AAV-miR SOD1-treated mice. As there is  
11 no loss of type IIB fibers to explain this apparent clustering in the AAV-miR SOD1-treated mice, it  
12 is likely to reflect fiber type conversion due to re-innervation of vacant endplates via the outgrowth  
13 of motor axon collaterals.

#### 14 **Transcriptional signature of MN in the spinal cord of miR SOD1-treated ALS mice reveals** 15 **changes in genes controlling microtubule stability**

16 Next, we sought to explore the changes in gene expression induced by the presence of mSOD1-  
17 expressing astrocytes in the lumbar spinal cord. Similar to our previous experiment, *SOD1<sup>G93A</sup>*  
18 mice were ICV injected at 2 days of age either with the AAV-miR SOD1 vector or with AAV-miR  
19 ctrl. An additional group of non-injected *SOD1<sup>G93A</sup>* littermate mice was included in the experiment.  
20 At day 65, a transcriptomic analysis was performed on MN captured by laser microdissection in the  
21 ventral horn. This time point was selected for analysis of gene expression across conditions, as the  
22 number of surviving MN was previously found to be very similar in each group (see Fig. 2b),  
23 avoiding any confounding effects due to differences in MN survival. Whole transcriptome was  
24 analyzed by next generation sequencing, reaching on average  $5.3E7 \pm 1.0E7$  reads per sample  
25 (mean  $\pm$  SD), out of which  $4.2E7 \pm 0.9E7$  reads were aligned to the reference mouse genome.  
26 With the statistical tool DESeq2, we found 95 genes with changes in expression induced by SOD1  
27 silencing with a false discovery rate (FDR) below 10% (Fig. 6a). Sixty-four genes were significantly

1 upregulated and 31 genes downregulated in the AAV-miR SOD1 mice, as compared to untreated  
2 and AAV-miR ctrl injected *SOD1<sup>G93A</sup>* mice. For several differentially expressed genes, the changes  
3 in gene expression were confirmed by qPCR (Supplemental Table 1). A gene ontology analysis for  
4 biological processes was performed with the software GOrilla (<http://cbl-gorilla.cs.technion.ac.il/>),  
5 taking into account the genes with a FDR below 20% (473 genes) as compared to the total list of  
6 identified genes. Analysis showed a significant enrichment for genes involved in heme  
7 biosynthesis ( $P = 8.15E-9$ ), chromatin organization ( $P = 8.53E-5$ ), microtubule stability ( $P = 5.24E-$   
8 4) and synaptic glutamatergic transmission ( $P = 7.49E-4$ ).

9 We sought for gene expression changes related to the observed effects of AAV-miR SOD1 on  
10 neuronal plasticity. As compared to control conditions, we found three genes of the Stathmin family  
11 to be downregulated (*Stmn2*, *Stmn3* and *Stmn4*) (Fig. 6b). Stathmins are involved in neuronal  
12 plasticity and have been shown to destabilize microtubules and inhibit their polymerization by  
13 sequestering  $\alpha\beta$ -tubulin heterodimers<sup>28</sup>. The *Mapt* gene encoding the microtubule-binding protein  
14 tau was also downregulated in the AAV-miR SOD1 condition (Fig. 6b). In addition, expression of  
15 the  $\alpha$ -tubulin-acetyl transferase gene *Atac1* was significantly downregulated, in contrast to the  
16 expression of the kinesin motor proteins Kif18a and Kif18b, which were upregulated following  
17 SOD1 silencing (Fig. 6b). Overall, these changes in gene expression showed that the AAV-miR  
18 SOD1 treatment affects microtubule dynamics in spinal cord MN, at the level of factors controlling  
19 the polymerization, stability and post-translational modifications of tubulin. Furthermore, the  
20 expression of *Fbxo5* was significantly upregulated in the treated mice (Fig. 6b). *Fbxo5* is a  
21 suppressor of Cdh1 implicated in axoneogenesis in the adult CNS<sup>29</sup>. AAV-miR SOD1 treated mice  
22 showed downregulation of BDNF (Fig. 6b), a neurotrophic factor implicated in the competition  
23 between axons for making neuromuscular connections<sup>30</sup>. The effects of BDNF depend on the  
24 proteolytic conversion from the pro- to the mature form of the neurotrophic factor. Indeed, the  
25 transcription of *Furin*, a key enzyme in this process, was increased in AAV-miR SOD1-injected  
26 mice (Fig. 6b).

27 Changes in MN activity were previously observed in models of SOD1-related ALS, shifting from  
28 hyper- to hypoexcitability in adult spinal motoneurons<sup>31,32</sup>. In addition, expression of mSOD1

1 affects the ability of astrocytes to regulate glutamate receptor expression in MN <sup>33</sup>. Here, AAV-miR  
2 SOD1 had a significant effect on the expression of several genes involved in synaptic  
3 neurotransmission. Notably, subunit-encoding genes of the ionotropic glutamate receptor family  
4 such as *Gria1* (glutamate ionotropic receptor 1, AMPA1) and *Grid2* (glutamate ionotropic receptor  
5 delta type subunit 2) were significantly downregulated (Supplemental Fig. S4a, b). Similarly, the  
6 levels of the transcripts encoding the gamma-aminobutyric acid (GABA) A receptor subunits  $\gamma$ 1  
7 and  $\gamma$ 2 were significantly reduced in the AAV-miR SOD1 treated condition (Supplemental Fig. S4c,  
8 d). Genes implicated in cholinergic neurotransmission such as *ChAT* (choline acetyl transferase)  
9 and *Slc5a7* (high affinity choline transporter 1) were also downregulated (Supplemental Fig. S4e,  
10 f). Changes in the expression of genes implicated in neurotransmission may reflect MN plasticity  
11 and motor circuit homeostasis following AAV-miR SOD1 gene therapy targeting astrocytes.

## 12 **Discussion**

13 In the *SOD1<sup>G93A</sup>* mouse model of ALS, we show that gene therapy to express specifically in  
14 astrocytes an artificial miR driving the selective silencing of human SOD1 leads to an improvement  
15 of the neuromuscular function during the late phase of disease. These results further support the  
16 important role of astrocytes in ALS. Indeed, WT glial-restricted progenitor cells implanted into the  
17 spinal cord of *SOD1<sup>G93A</sup>* rats efficiently differentiate into astrocytes and improve neuromuscular  
18 function <sup>34</sup>. Similar results were obtained by transplanting astrocytes derived from healthy human  
19 iPSC into the spinal cord of *SOD1<sup>G93A</sup>* mice <sup>35</sup>. Conversely, the transplantation of astrocytes  
20 expressing mSOD1 in WT mice leads to MN dysfunction, with negative effects on the  
21 neuromuscular function <sup>36</sup>.

22 Our results indicate that AAV-miR SOD1 gene therapy targeting astrocytes enhances the  
23 propensity of MN to form new synapses on motor end plates. Astrocytes are known to release  
24 molecules that modulate synaptic activity and also control the formation, stabilization and  
25 elimination of synapses (reviewed in <sup>37</sup>). Astrocytes can secrete matricellular proteins such as  
26 thrombospondin (TSB), secreted protein acidic and rich in cysteine like1 (SPARCL1), and SPARC

1 (an antagonist of SPARCL1 also known as osteonectin), which have been shown to regulate  
2 synaptogenesis<sup>38-40</sup>. These mechanisms are typically mediated by astrocytes in close contact with  
3 synaptic connections. However, it is unclear how the astrocyte-MN crosstalk in the spinal cord may  
4 regulate the distal formation of NMJ. Factors secreted by astrocytes and Schwann cells can  
5 mediate synapse formation in spinal MN cultures<sup>41</sup>. In *Drosophila*, glial cells present at the NMJ  
6 contribute to the remodeling of the synaptic connections by removing presynaptic debris and  
7 immature boutons<sup>42</sup>. In vertebrates, it is mainly terminal Schwann cells which have been reported  
8 to control the formation, maintenance, repair and pruning of the synapse at the NMJ<sup>43</sup>. In  
9 *SOD1<sup>G93A</sup>* mice, Schwann cells express Sema3a, a chemorepellent inhibiting axonal outgrowth at  
10 the NMJ of type IIB/IIX muscle fibers, which are the first fibers to lose innervation in ALS<sup>44</sup>.  
11 Similarly, Sema3a is expressed by a subpopulation of astrocytes during development to control  
12 axonal guidance in alpha-MN<sup>45</sup>.  
13 AAV-miR SOD1 treatment enhances limb strength in the grip test, which is coherent with the  
14 observed protection of type IIB muscle fibers in the *triceps surae*, and the significant protection of  
15 MN with high MMP9 expression. These neurons may constitute a pool of fast-fatigable MN  
16 protected from neurodegeneration. This effect might as well reflect a gain of MMP9 expression in  
17 the remaining pool of MN, similar to what has been observed in another transgenic mouse model  
18 of ALS following suppression of the cytosolic TDP-43 transgene<sup>46</sup>. It remains however unclear  
19 whether the expression of MMP9 is necessary for NMJ re-innervation. In non-diseased conditions,  
20 NMJ re-innervation following injury has been found to occur more rapidly in fast-fatigable than in  
21 slow MN<sup>47</sup>. In rodent models of ALS however, sprouting events appear to mainly occur in fatigue-  
22 resistant and slow MN, whereas there is so far no evidence for similar effects in the fast-fatigable  
23 pool<sup>48,49</sup>. Here, the remarkable protection of type IIB fibers indicates that gene therapy targeting  
24 astrocytes in the *SOD1<sup>G93A</sup>* mouse model of ALS may enhance re-innervation even in fast muscles.  
25 Fiber type grouping is observed in patients suffering from spinal and bulbar muscular atrophy, but  
26 to a lesser extent in ALS patients<sup>50,51</sup>. In contrast to other neuromuscular disorders, it is therefore  
27 possible that either the ability of MN to remodel neuromuscular synaptic connections is impaired in  
28 ALS, or that disease causes extensive degeneration before muscle fiber grouping can be

1 observed. The observed increase in clustering of type I and type IIA muscle fibers shows that the  
2 AAV-miR SOD1 treatment enhances the ability of the surviving MN to make new functional  
3 connections with the muscle towards disease end stage, and that this effect is likely to involve all  
4 types of MN in the spinal cord. Similarly, treatment of *SOD1*<sup>G93A</sup> ALS mice with antisense  
5 oligonucleotides (ASO) targeting SOD1 also induces a gain in CMAP amplitude at a later stage of  
6 the disease, indicating possible rescue effects also with this mode of treatment<sup>52</sup>. However, it is  
7 unclear to which extent the ASO treatment targets mSOD1 expression in astrocytes.

8 The analysis of gene pathways in MN highlights changes in the expression of genes regulating  
9 microtubule dynamics following AAV-miR SOD1 treatment. In particular, genes of the Stathmin  
10 family are consistently downregulated, which may reflect increased microtubule stability. Previous  
11 studies have shown in a mouse model of spinal muscular atrophy that decreased expression of  
12 stathmins ameliorates neuromuscular defects<sup>53</sup>. In ALS, stathmins have also been implicated in  
13 the loss of microtubules leading to Golgi fragmentation in mutant SOD1 MN and to other defects in  
14 ALS notably through its action on Stat3 (signal transducer and activator of transcription 3)<sup>54-56</sup>.  
15 More recently, TDP43 has been found to be a transcriptional repressor of *Stmn2*, further  
16 highlighting the role of stathmin regulation in ALS<sup>57,58</sup>. We found that the treatment affects the  
17 expression of other microtubule-associated proteins in MN. There is a significant downregulation of  
18 the *Mapt* gene, which has previously been associated to the risk of developing sALS<sup>59,60</sup>. Here,  
19 changes in the expression level of the microtubule-binding tau protein may affect cytoskeleton  
20 dynamics, possibly via its role in stabilizing long labile microtubule domains<sup>61,62</sup>. The upregulation  
21 of the kinesin-8 family members *Kif18a* and *Kif18b*, which have been reported to have microtubule  
22 depolymerizing activity may further contribute to controlling axon length<sup>63</sup>. Remarkably,  
23 transcriptomic analysis also reveals changes related to the post-translational modifications of  
24 tubulin. The transcriptional downregulation of *Atat1* (alpha tubulin acetyltransferase 1) may reflect  
25 changes in the level of this enzyme controlling  $\alpha$ -tubulin acetylation and thereby axonal branching  
26<sup>64</sup>. *Atat1* also regulates microtubule stability independently from its activity on tubulin acetylation<sup>65</sup>.  
27 Remarkably, the observed downregulation of BDNF transcription is concomitant with an

1 upregulation of the proteolytic enzyme Furin, which may facilitate the activity-dependent  
2 stabilization of NMJ via the processing of pro-BDNF<sup>30,66</sup>.  
3 Overall, the use of AAV-based therapy targeting astrocytes as a platform to silence mSOD1 in the  
4 motor system of *SOD1*<sup>G93A</sup> ALS mice shows major effects on the ability on the MN to maintain  
5 functional connections with muscle fibers. These results further emphasize the importance of  
6 astrocytic cells when designing gene therapies to slow down ALS progression.

## 1 **Materials and Methods**

### 2 *Animals and vector administration*

3 All animal works were performed in accordance with the Swiss legislation and the European  
4 Community Council directive (86/609/EEC) for the care and use of laboratory animals. B6.Cg-  
5 Tg(SOD1\*G93A)dl1Gur/J mice (The Jackson Laboratory, Bar Harbor, USA) were mated with  
6 C57BL/6J females (Charles River Laboratories, Bois des Oncins, France). Newborn pups were  
7 genotyped at birth by polymerase chain reaction (PCR) against human SOD1. ICV injections were  
8 performed on 2-days-old pups as previously described <sup>26</sup>. AAV vector suspensions were diluted in  
9 a physiologic solution of sodium chloride and mixed with 0.1% Fast Green FCF (Sigma-Aldrich) to  
10 visualize spread of the vector suspension throughout the ventricles. Three microliters of viral  
11 suspension were injected into the left lateral ventricle, using a 29G insulin syringe (B. Braun,  
12 Hessen, Germany).

### 13 *Viral vector production*

14 The engineering and production of the AAV vectors were performed as previously described <sup>25</sup>.  
15 Briefly, the following microRNA sequences: miR SOD1: 5'-ATT ACT TTC CTT CTG CTC GAA-3'  
16 and miR ctrl: 5'-AAA TGT ACT GCG CGT GGA GAC-3' were introduced into the pre-microRNA  
17 backbone of murine miR-155' and further cloned under the minimal GFAP promoter gfaABC<sub>1</sub>D into  
18 the pAAV-MCS:gfp plasmid expression cassettes. For production of recombinant AAV9 particles,  
19 shuttle plasmids were co-transfected with the pDF9 helper plasmid into HEK293-AAV cells (Agilent  
20 Technologies, Santa Clara, USA). Cells were lysed 72h following transfection. Viral particles were  
21 sequentially purified on iodixanol (Axis-shield, Dundee, United Kingdom) and ion-exchange affinity  
22 columns (GE Healthcare, Italy). Viral genomic copies were measured by TaqMan quantitative PCR  
23 (Invitrogen) using primers recognizing the human  $\beta$ -globin intron. The AAV9 vectors were injected  
24 at a titer of 1.4E14 viral genomes (VG)/mL for the behavioral study and at a dose of 2.9E14 VG/mL  
25 for the MN transcriptome analysis.

26

## 1 *Behavioral testing and electromyography*

2 Cohorts used for behavioral experiments were litter-matched. Evoked CMAP amplitude in the  
3 *triceps surae* was evaluated using the electromyographic apparatus (AD Instruments, Oxford, UK)  
4 as described previously<sup>25</sup>. For muscle strength measurements, each mouse was hold by the tail  
5 while lifting metal grids with defined weights of 20 g, 30 g and 40 g. The maximal duration of the  
6 test was set at 30 s. Two successive trials were performed with each grid. The inter-trial interval  
7 was set at 30 s. For each grid, the score was calculated by multiplying the best time performance  
8 by the weight of the grid. For each mouse, the total score was defined as the sum of the scores  
9 obtained for each of the three grids. For the rotarod test, the mouse was placed on an accelerating  
10 rod, at a speed constantly increasing from 4 to 40 rpm, during a maximal period of 300 s. The  
11 performance was measured as the time during which the mouse was able to maintain itself on the  
12 rotating rod. For *SOD1<sup>G93A</sup>* mice, the end stage of the disease was defined as the time at which the  
13 animal could no longer right itself within 20 s after being placed on its flank.

## 14 *Histological analysis*

15 Mice were sacrificed at the mentioned age or at end stage of the disease by intra-peritoneal  
16 injection of pentobarbital (Streuli Pharma, Uznach, Switzerland). Mice were transcardially perfused  
17 with PBS and one *gastrocnemius* muscle was directly embedded in Cryomatrix (Thermo Fisher  
18 Scientific), frozen on dry ice and kept at -80°C for muscle fiber analysis. Animals were further  
19 perfused with paraformaldehyde 4% (PFA, Karl Roth). The second *gastrocnemius* muscle and  
20 spinal cord were post-fixed in PFA 4% for 20 min and 90 min, respectively, before being  
21 transferred to a 25% sucrose solution.

22 Twenty-five µm thick sections of the lumbar spinal cord were cut on a cryostat and conserved free  
23 floating in PBS-azide solution. Twelve µm thick transversal sections of unfixed *triceps surae*  
24 muscle and 20 µm thick longitudinal sections of fixed *gastrocnemius* muscle were cut on a cryostat  
25 directly on glass slides.

26 For immunostaining, sections were incubated in a 0.15% Triton X-100, 2% bovine serum albumin  
27 (BSA), 3% normal horse serum blocking solution for 1 h at room temperature (RT). Sections were



1 then incubated for 24 h at 4°C with primary antibodies diluted in blocking solution. Sections were  
2 washed and incubated with secondary antibody diluted in blocking solution for 1 hr at RT.  
3 Avidin–biotin/3,3'-diaminobenzidine method (Vectors Laboratories Inc. Burlingame, USA) was  
4 applied to reveal goat anti-ChAT (1:500, Chemicon Millipore, Billerica, USA), goat anti-MMP9  
5 (1:1000, Sigma-Aldrich) and rabbit anti-IBA1 (1:2000, Wako Pure Chemical Industries, Osaka,  
6 Japan) immunostainings. Secondary antibodies were: biotinylated horse anti-goat IgG or  
7 biotinylated goat anti-rabbit IgG (1:200, Vector BA). Forty-eight h incubation of the primary  
8 antibody and nickel ammonium sulfate enhancement was used for MMP9 staining.  
9 Other antibodies were: rabbit anti-GFAP (DakoCytomation, Glostrup, Denmark), mouse anti-SV2  
10 (1:40, Developmental Studies Hybridoma Bank (DSHB), University of Iowa, Iowa City, USA), and  
11 rabbit anti-NFM-145 (1:500, Chemicon Millipore), goat anti-rabbit Cy3, donkey anti-mouse Cy3,  
12 goat anti-rabbit alexa 488 (1:500, Jackson ImmunoResearch Laboratories, West Grove, USA) and  
13 tetramethylrhodamine  $\alpha$ -bungarotoxin (1:500, Invitrogen). For muscle fiber type identification,  
14 transversal sections of *triceps surae* were stained with a cocktail of antibodies from DSHB: mouse  
15 anti-MyHC I (BA-D5, 1:500), mouse anti-MyHC IIa (SC-71, 1:500), mouse anti-MyHC IIb (BF-F3,  
16 1:100), and rabbit anti-dystrophin (1:200, Abcam). The secondary antibodies used were: goat anti-  
17 mouse IgG2b-alexa 647 (1:500), goat anti-mouse IgG1-alexa 488 (1:500), goat anti-mouse IgM-  
18 AMCA (1:200) and goat anti-rabbit cy3 (1:500) (Jackson ImmunoResearch Laboratories).

### 19 *Quantification*

20 For cell counts in the spinal cord, one every ten sections were stained and counted. ChAT and  
21 MMP9-positive MN were manually counted in the ventral horn of the lumbar spinal cord section  
22 using an Olympus AX70 microscope (Olympus Corporation, Japan). Microglial activation was  
23 evaluated by manually counting Iba1-positive microglial cells. Astrocytic activation was assessed in  
24 the ventral horn of GFAP-stained lumbar sections. GFAP-positive total area was determined with  
25 ImageJ using percentile thresholding. For assessments of Iba1 and GFAP activation, five sections  
26 of the spinal cord representing ten ventral horns per animal were used. Pictures were taken with a  
27 20X objective on a Leica DM5500 microscope (Leica, Wetzlar, Germany).

1 Neuromuscular innervation was quantified on 20  $\mu\text{m}$ -deep z-stack pictures of at least 3 fields of  
2 view per *gastrocnemius*. Sixty endplates identified using  $\alpha$ -bungarotoxin staining were counted per  
3 muscle. Endplates were categorized as denervated, completely or partial innervated, according to  
4 the co-staining with the SV2 marker. Pictures were taken with a 20X objective on a Leica DM5500  
5 microscope.

6 For muscle pattern analysis, pictures of the entire muscle section were taken with a 20X objective  
7 on an Olympus slide scanner VS120-L100. Pictures were post processed with a home-made Fiji  
8 macro and analyzed with MATLAB. For each channel, a minimal gray intensity threshold was set  
9 using sections stained with the secondary antibodies alone. For a given channel, values above the  
10 threshold were considered as positive and the muscle fiber type determined accordingly. Muscle  
11 fibers with value below the threshold for all three channels were categorized as type IIX. Objects  
12 smaller than  $150 \mu\text{m}^2$  or bigger than  $5000 \mu\text{m}^2$  were excluded from the analyses.

13 Clustering analysis were done as follows: inter-fiber distances for fibers from the same subtype  
14 were determined according to their center of gravity. As each fiber is on average in contact with six  
15 other fibers, the median of the six shortest distances for each fiber was calculated. Median values  
16 were then averaged across all fibers from the same subtype. A second analysis was performed to  
17 determine the percentage of fibers in contact with another fiber from the same subtype. Briefly, the  
18 mean radius of a muscle fiber type was calculated based on the measured area of each fiber, and  
19 assuming that the fiber has a circular shape. If the distance between the centers of two fibers from  
20 the same subtype was longer than twice their radius plus two standard deviations, the fibers were  
21 categorized as not in contact with each other.

## 22 *Laser-capture microdissection of spinal cord MN, RNA sequencing and analysis*

23 Mice were sacrificed at 65 days by intra-peritoneal injection of pentobarbital (Streuli Pharma,  
24 Uznach, Switzerland). The lumbar part of the spinal cord with the vertebrae was directly embedded  
25 in OCT and frozen at  $-80^\circ\text{C}$ . Fourteen  $\mu\text{m}$  thick sections were cut on a cryostat and stained with a  
26 1% cresyl violet solution to reveal MN in lumbar spinal cord sections and guide laser-capture  
27 microdissection (PALM microscope, 20X, Zeiss). Total RNA was extracted from a pool of 500 MN

1 per mouse with the microRNeasy kit according to manufacturer's instruction (Qiagen). RNA was  
2 quantified with a Qubit (fluorimeter from Life Technologies) and RNA integrity confirmed with a  
3 Bioanalyzer (Agilent Technologies). The SMARTer™ Ultra Low RNA kit from Clontech was used  
4 for reverse transcription and cDNA amplification according to manufacturer's instructions, starting  
5 with 5 to 6 ng of total RNA as input. 200 pg of cDNA were used for library preparation using the  
6 Nextera XT kit from Illumina. Library molarity and quality was assessed with the Qubit and  
7 TapeStation using a DNA High sensitivity chip (Agilent Technologies). Pools of 6 libraries were  
8 loaded for clustering on Single-read Illumina Flow cells. Reads of 50 bases were generated on the  
9 Illumina HiSeq 2500 and 4000 sequencers. One sample was removed from the analysis because  
10 of the poor quality of the extracted RNA, another sample was removed because of low sequencing  
11 depth and three other samples were removed because histological examination showed only low  
12 GFP expression levels.

13 The purity-filtered reads were adapters and quality trimmed with Cutadapt (v. 1.8, <sup>67</sup>). Reads  
14 matching to ribosomal RNA sequences were removed with fastq\_screen (v. 0.9.3). Remaining  
15 reads were further filtered for low complexity with reaper (v. 15-065, <sup>68</sup>). Reads were aligned  
16 against *Mus musculus.GRCm38.86* genome using STAR (v. 2.5.2b, <sup>69</sup>). The number of read  
17 counts per gene locus was summarized with htseq-count (v. 0.6.1, <sup>70</sup>) using *Mus*  
18 *musculus.GRCm38.86* gene annotation. Quality of the RNA-seq data alignment was assessed  
19 using RSeQC (v. 2.3.7, <sup>71</sup>). Reads were also aligned to the *Mus*  
20 *musculus.GRCm38.86* transcriptome using STAR (v. 2.5.2b, <sup>69</sup>) and the estimation of the isoform  
21 abundance was computed using RSEM (v. 1.2.31, [19]).

22 Statistical analysis was performed in R (R version 3.4.0) on 18,371 protein coding genes with at  
23 least one read count in at least one sample. A multi-factorial statistical model including the effects  
24 of (1) SOD1 silencing, (2) AAV transduction (GFP) and (3) Batch was used with DESeq2 to identify  
25 95 miR SOD1 affected genes with a false discovery rate (FDR)  $\leq 10\%$  <sup>73</sup>. Prior to heatmap  
26 visualization, expression counts data were transformed with *regularized logarithm* (rlog), then  
27 batch-corrected. A gene ontology analysis for biological processes was performed with the  
28 software GOrilla (<http://cbl-gorilla.cs.technion.ac.il/>) comparing the list of differentially expressed

1 genes (FDR  $\leq$  20%) to the total list of identified genes. The set of RNA sequencing data is  
2 available through GEO with ID GSE148901.

### 3 *Quantitative PCR*

4 cDNA from the SMARTer™ Ultra Low RNA kit from Clontech used for reverse transcription of the  
5 RNA obtained by laser micro-dissection were utilized to perform SYBR™ Green qPCR relative  
6 quantification. The primer pairs for specific genes were purchased from Qiagen (QuantiTect Primer  
7 Assay, listed in Table 1). Relative quantification was calculated after normalization to the reference  
8 genes X-prolyl aminopeptidase (Xpnpep1) and casein kinase 2 (Csnk2b).

### 9 *Statistical analysis*

10 Data are presented as mean  $\pm$  standard error of the mean (SEM) or mean  $\pm$  standard deviation  
11 (SD) as stated in the figure legend. For most data sets, one-way ANOVA and Bonferroni *post hoc*  
12 tests were performed using MATLAB. For electromyographic measurements (CMAP), as well as  
13 performance in the grid and rotarod tests, data were analyzed using a two-way (group x time)  
14 repeated-measures ANOVA followed by a Newman-Keuls *post hoc* test using the Prism 8  
15 software. Analyses of muscle fiber clustering comparing wild-type and treated mice was performed  
16 using two-tailed unpaired *t* test. For all statistical analyses, the  $\alpha$  level of significance was set a  
17 0.05.

### 18 **Acknowledgments**

19 The Authors would like to thank Philippe Colin and Christel Voize for their technical support. We  
20 also thank Aline Aebi, Fabienne Pidoux and Viviane Padrun for the technical support and  
21 production of viral vectors used in the present study; Mylène Docquier and the Institute of Genetics  
22 and Genomics of Geneva (iGE3; <http://www.ige3.unige.ch/genomics-platform.php>) for high-  
23 throughput DNA sequencing. This work was supported by Swiss National Science Foundation  
24 grant (310030L\_156460/1 to B.L.S., P.A., F.P. and C.Ra.) and by ERANET E-Rare FaSMALS  
25 (Grant 3ER30\_160673, to B.L.S. and C.Ra.). This research work was also in part supported by a  
26 generous donation from Drs Paul and Christa Plichta to honor Mr Boris Canessa.

1 The Authors declare that there is no conflict of interest.

2

### 3 **Authors contributions**

4 Conceptualization, C.Ro., N.B.M., C.Ra., F.E.P. and B.L.S.; Methodology, C.Ro., F.E.P., S.P. and  
5 B.L.S.; Investigation, C.Ro., N.B.M., F.E.P. and S.P.; Writing – Original Draft, C.Ro., N.B.M. and  
6 B.L.S.; Writing – Review & Editing, C.Ra.; Funding Acquisition, C.Ra., F.E.P., P.A. and B.L.S.;  
7 Supervision, B.L.S.

### 8 **References**

- 9 1. Taylor, J.P., Brown, R.H., and Cleveland, D.W. (2016). Decoding ALS: from genes to  
10 mechanism. *Nature* 539, 197–206.
- 11 2. Gurney, M.E., Pu, H., Chiu, A.Y., Dal Canto, M.C., Polchow, C.Y., Alexander, D.D.,  
12 Caliendo, J., Hentati, A., Kwon, Y.W., Deng, H.X., et al. (1994). Motor neuron  
13 degeneration in mice that express a human Cu,Zn superoxide dismutase mutation.  
14 *Science* 264, 1772–5.
- 15 3. Pun, S., Santos, A.F., Saxena, S., Xu, L., and Caroni, P. (2006). Selective vulnerability  
16 and pruning of phasic motoneuron axons in motoneuron disease alleviated by CNTF.  
17 *Nat Neurosci* 9, 408–19.
- 18 4. Beers, D.R., Henkel, J.S., Xiao, Q., Zhao, W., Wang, J., Yen, A.A., Siklos, L.,  
19 McKercher, S.R., and Appel, S.H. (2006). Wild-type microglia extend survival in PU.1  
20 knockout mice with familial amyotrophic lateral sclerosis. *Proc Natl Acad Sci U S A*  
21 103, 16021–6.
- 22 5. Boillee, S., Yamanaka, K., Lobsiger, C.S., Copeland, N.G., Jenkins, N.A., Kassiotis,  
23 G., Kollias, G., and Cleveland, D.W. (2006). Onset and progression in inherited ALS  
24 determined by motor neurons and microglia. *Science* 312, 1389–92.
- 25 6. Pramatarova, A., Laganriere, J., Roussel, J., Brisebois, K., and Rouleau, G.A. (2001).  
26 Neuron-specific expression of mutant superoxide dismutase 1 in transgenic mice does  
27 not lead to motor impairment. *J Neurosci* 21, 3369–74.
- 28 7. Kang, S.H., Li, Y., Fukaya, M., Lorenzini, I., Cleveland, D.W., Ostrow, L.W., Rothstein,  
29 J.D., and Bergles, D.E. (2013). Degeneration and impaired regeneration of gray matter  
30 oligodendrocytes in amyotrophic lateral sclerosis. *Nat Neurosci* 16, 571–9.
- 31 8. Yamanaka, K., Boillee, S., Roberts, E.A., Garcia, M.L., McAlonis-Downes, M., Mikse,  
32 O.R., Cleveland, D.W., and Goldstein, L.S. (2008). Mutant SOD1 in cell types other  
33 than motor neurons and oligodendrocytes accelerates onset of disease in ALS mice.  
34 *Proc Natl Acad Sci U S A* 105, 7594–9.
- 35 9. Aebischer, J., Cassina, P., Otsmane, B., Moumen, A., Seilhean, D., Meininger, V.,  
36 Barbeito, L., Pettmann, B., and Raoul, C. (2011). IFN $\gamma$  triggers a LIGHT-dependent  
37 selective death of motoneurons contributing to the non-cell-autonomous effects of  
38 mutant SOD1. *Cell Death Differ* 18, 754–768.
- 39 10. Haidet-Phillips, A.M., Hester, M.E., Miranda, C.J., Meyer, K., Braun, L., Frakes, A.,  
40 Song, S., Likhite, S., Murtha, M.J., Foust, K.D., et al. (2011). Astrocytes from familial

- 1 and sporadic ALS patients are toxic to motor neurons. *Nat Biotechnol* 29, 824–8.
- 2 11. Nagai, M., Re, D.B., Nagata, T., Chalazonitis, A., Jessell, T.M., Wichterle, H., and  
3 Przedborski, S. (2007). Astrocytes expressing ALS-linked mutated SOD1 release  
4 factors selectively toxic to motor neurons. *Nat Neurosci* 10, 615–22.
- 5 12. Ramírez-Jarquín, U.N., Rojas, F., Zundert, B. van, and Tapia, R. (2017). Chronic  
6 infusion of SOD1G93A astrocyte-secreted factors induces spinal motoneuron  
7 degeneration and neuromuscular dysfunction in healthy rats. *J Cell Physiol* 232, 2610–  
8 2615.
- 9 13. Rothstein, J.D., Van Kammen, M., Levey, A.I., Martin, L.J., and Kuncl, R.W. (1995).  
10 Selective loss of glial glutamate transporter GLT-1 in amyotrophic lateral sclerosis.  
11 *Ann Neurol* 38, 73–84.
- 12 14. Ferraiuolo, L., Higginbottom, A., Heath, P.R., Barber, S., Greenald, D., Kirby, J., and  
13 Shaw, P.J. (2011). Dysregulation of astrocyte-motoneuron cross-talk in mutant  
14 superoxide dismutase 1-related amyotrophic lateral sclerosis. *Brain* 134, 2627–41.
- 15 15. Tripathi, P., Rodriguez-Muela, N., Klim, J.R., de Boer, A.S., Agrawal, S., Sandoe, J.,  
16 Lopes, C.S., Ogliari, K.S., Williams, L.A., Shear, M., et al. (2017). Reactive Astrocytes  
17 Promote ALS-like Degeneration and Intracellular Protein Aggregation in Human Motor  
18 Neurons by Disrupting Autophagy through TGF- $\beta$ 1. *Stem Cell Rep* 9, 667–680.
- 19 16. Endo, F., Komine, O., Fujimori-Tonou, N., Katsuno, M., Jin, S., Watanabe, S., Sobue,  
20 G., Dezawa, M., Wyss-Coray, T., and Yamanaka, K. (2015). Astrocyte-Derived TGF-  
21  $\beta$ 1 Accelerates Disease Progression in ALS Mice by Interfering with the  
22 Neuroprotective Functions of Microglia and T Cells. *Cell Rep* 11, 592–604.
- 23 17. Anneser, J.M.H., Cookson, M.R., Ince, P.G., Shaw, P.J., and Borasio, G.D. (2001).  
24 Glial Cells of the Spinal Cord and Subcortical White Matter Up-regulate Neuronal Nitric  
25 Oxide Synthase in Sporadic Amyotrophic Lateral Sclerosis. *Exp Neurol* 171, 418–421.
- 26 18. Catania, M.V., Aronica, E., Yankaya, B., and Troost, D. (2001). Increased expression  
27 of neuronal nitric oxide synthase spliced variants in reactive astrocytes of amyotrophic  
28 lateral sclerosis human spinal cord. *J. Neurosci.* 21, RC148.
- 29 19. Bi, F., Huang, C., Tong, J., Qiu, G., Huang, B., Wu, Q., Li, F., Xu, Z., Bowser, R., Xia,  
30 X.G., et al. (2013). Reactive astrocytes secrete lcn2 to promote neuron death. *Proc*  
31 *Natl Acad Sci U S A* 110, 4069–74.
- 32 20. Raoul, C., Abbas-Terki, T., Bensadoun, J.C., Guillot, S., Haase, G., Szulc, J.,  
33 Henderson, C.E., and Aebischer, P. (2005). Lentiviral-mediated silencing of SOD1  
34 through RNA interference retards disease onset and progression in a mouse model of  
35 ALS. *Nat Med* 11, 423–8.
- 36 21. Ralph, G.S., Radcliffe, P.A., Day, D.M., Carthy, J.M., Leroux, M.A., Lee, D.C., Wong,  
37 L.F., Bilsland, L.G., Greensmith, L., Kingsman, S.M., et al. (2005). Silencing mutant  
38 SOD1 using RNAi protects against neurodegeneration and extends survival in an ALS  
39 model. *Nat Med* 11, 429–33.
- 40 22. Stoica, L., Todeasa, S.H., Cabrera, G.T., Salameh, J.S., EIMallah, M.K., Mueller, C.,  
41 Brown, R.H., and Miguel, S.-E. (2016). AAV delivered artificial microRNA extends  
42 survival and delays paralysis in an Amyotrophic Lateral Sclerosis mouse model. *Ann*  
43 *Neurol* 79, 687–700.
- 44 23. Foust, K.D., Salazar, D.L., Likhite, S., Ferraiuolo, L., Ditsworth, D., Ilieva, H., Meyer,  
45 K., Schmelzer, L., Braun, L., Cleveland, D.W., et al. (2013). Therapeutic AAV9-  
46 mediated Suppression of Mutant SOD1 Slows Disease Progression and Extends  
47 Survival in Models of Inherited ALS. *Mol Ther* 21, 2148–2159.
- 48 24. McCampbell, A., Cole, T., Wegener, A.J., Tomassy, G.S., Setnicka, A., Farley, B.J.,  
49 Schoch, K.M., Hoye, M.L., Shabsovich, M., Sun, L., et al. (2018). Antisense  
50 oligonucleotides extend survival and reverse decrement in muscle response in ALS

- 1 models. *J Clin Invest* 128, 3558–3567.
- 2 25. Dirren, E., Aebischer, J., Rochat, C., Towne, C., Schneider, B.L., and Aebischer, P.  
3 (2015). SOD1 silencing in motoneurons or glia rescues neuromuscular function in ALS  
4 mice. *Ann Clin Transl Neurol* 2, 167–84.
- 5 26. Dirren, E., Towne, C.L., Setola, V., Redmond, D.E., Schneider, B.L., and Aebischer, P.  
6 (2014). Intracerebroventricular injection of adeno-associated virus 6 and 9 vectors for  
7 cell type-specific transgene expression in the spinal cord. *Hum Gene Ther* 25, 109–20.
- 8 27. Kaplan, A., Spiller, K.J., Towne, C., Kanning, K.C., Choe, G.T., Geber, A., Akay, T.,  
9 Aebischer, P., and Henderson, C.E. (2014). Neuronal matrix metalloproteinase-9 is a  
10 determinant of selective neurodegeneration. *Neuron* 81, 333–48.
- 11 28. Chauvin, S., and Sobel, A. (2015). Neuronal stathmins: a family of phosphoproteins  
12 cooperating for neuronal development, plasticity and regeneration. *Prog Neurobiol*  
13 126, 1–18.
- 14 29. Haenold, R., Weih, F., Herrmann, K.-H., Schmidt, K.-F., Krempler, K., Engelmann, C.,  
15 Nave, K.-A., Reichenbach, J.R., Lowel, S., Witte, O.W., et al. (2014). NF- $\kappa$ B controls  
16 axonal regeneration and degeneration through cell-specific balance of RelA and p50 in  
17 the adult CNS. *Development* 141, e1505–e1505.
- 18 30. Je, H.S., Yang, F., Ji, Y., Potluri, S., Fu, X.-Q., Luo, Z.-G., Nagappan, G., Chan, J.P.,  
19 Hempstead, B., Son, Y.-J., et al. (2013). ProBDNF and Mature BDNF as Punishment  
20 and Reward Signals for Synapse Elimination at Mouse Neuromuscular Junctions. *J*  
21 *Neurosci* 33, 9957–9962.
- 22 31. Delestrée, N., Manuel, M., Iglesias, C., Elbasiouny, S.M., Heckman, C.J., and Zytnicki,  
23 D. (2014). Adult spinal motoneurons are not hyperexcitable in a mouse model of  
24 inherited amyotrophic lateral sclerosis. *J Physiol* 592, 1687–1703.
- 25 32. Martínez-Silva, M. de L., Imhoff-Manuel, R.D., Sharma, A., Heckman, C., Shneider,  
26 N.A., Roselli, F., Zytnicki, D., and Manuel, M. (2018). Hypoexcitability precedes  
27 denervation in the large fast-contracting motor units in two unrelated mouse models of  
28 ALS. *eLife* 7, e30955.
- 29 33. Van Damme, P., Bogaert, E., Dewil, M., Hersmus, N., Kiraly, D., Scheveneels, W.,  
30 Bockx, I., Braeken, D., Verpoorten, N., Verhoeven, K., et al. (2007). Astrocytes  
31 regulate GluR2 expression in motor neurons and their vulnerability to excitotoxicity.  
32 *Proc Natl Acad Sci USA* 104, 14825.
- 33 34. Lepore, A.C., Rauck, B., Dejea, C., Pardo, A.C., Rao, M.S., Rothstein, J.D., and  
34 Maragakis, N.J. (2008). Focal transplantation-based astrocyte replacement is  
35 neuroprotective in a model of motor neuron disease. *Nat Neurosci* 11, 1294–301.
- 36 35. Kondo, T., Funayama, M., Tsukita, K., Hotta, A., Yasuda, A., Nori, S., Kaneko, S.,  
37 Nakamura, M., Takahashi, R., Okano, H., et al. (2014). Focal transplantation of human  
38 iPSC-derived glial-rich neural progenitors improves lifespan of ALS mice. *Stem Cell*  
39 *Rep* 3, 242–9.
- 40 36. Papadeas, S.T., Kraig, S.E., O'Banion, C., Lepore, A.C., and Maragakis, N.J. (2011).  
41 Astrocytes carrying the superoxide dismutase 1 (SOD1G93A) mutation induce wild-  
42 type motor neuron degeneration in vivo. *Proc Natl Acad Sci U S A* 108, 17803–8.
- 43 37. Clarke, L.E., and Barres, B.A. (2013). Emerging roles of astrocytes in neural circuit  
44 development. *Nat Rev Neurosci* 14, 311–321.
- 45 38. Blakely, P.K., Hussain, S., Carlin, L.E., and Irani, D.N. (2015). Astrocyte matricellular  
46 proteins that control excitatory synaptogenesis are regulated by inflammatory  
47 cytokines and correlate with paralysis severity during experimental autoimmune  
48 encephalomyelitis. *Front Neurosci* 9.
- 49 39. Christopherson, K.S., Ullian, E.M., Stokes, C.C.A., Mallowney, C.E., Hell, J.W., Agah,  
50 A., Lawler, J., Mosher, D.F., Bornstein, P., and Barres, B.A. (2005). Thrombospondins

- 1 Are Astrocyte-Secreted Proteins that Promote CNS Synaptogenesis. *Cell* 120, 421–  
2 433.
- 3 40. Kucukdereli, H., Allen, N.J., Lee, A.T., Feng, A., Ozlu, M.I., Conatser, L.M.,  
4 Chakraborty, C., Workman, G., Weaver, M., Sage, E.H., et al. (2011). Control of  
5 excitatory CNS synaptogenesis by astrocyte-secreted proteins Hevin and SPARC.  
6 *PNAS* 108, E440–E449.
- 7 41. Ullian, E.M., Harris, B.T., Wu, A., Chan, J.R., and Barres, B.A. (2004). Schwann cells  
8 and astrocytes induce synapse formation by spinal motor neurons in culture. *Mol Cell*  
9 *Neurosci* 25, 241–251.
- 10 42. Fuentes-Medel, Y., Logan, M.A., Ashley, J., Ataman, B., Budnik, V., and Freeman,  
11 M.R. (2009). Glia and Muscle Sculpt Neuromuscular Arbors by Engulfing Destabilized  
12 Synaptic Boutons and Shed Presynaptic Debris. *PLOS Biology* 7, e1000184.
- 13 43. Feng, Z., and Ko, C.-P. (2008). Schwann Cells Promote Synaptogenesis at the  
14 Neuromuscular Junction via Transforming Growth Factor- $\beta$ 1. *J Neurosci* 28, 9599–  
15 9609.
- 16 44. Winter, F.D., Vo, T., Stam, F.J., Wisman, L.A.B., Bär, P.R., Niclou, S.P., van  
17 Muiswinkel, F.L., and Verhaagen, J. (2006). The expression of the chemorepellent  
18 Semaphorin 3A is selectively induced in terminal Schwann cells of a subset of  
19 neuromuscular synapses that display limited anatomical plasticity and enhanced  
20 vulnerability in motor neuron disease. *Mol Cell Neurosci* 32, 102–117.
- 21 45. Molofsky, A.V., Kelley, K.W., Tsai, H.H., Redmond, S.A., Chang, S.M., Madireddy, L.,  
22 Chan, J.R., Baranzini, S.E., Ullian, E.M., and Rowitch, D.H. (2014). Astrocyte-encoded  
23 positional cues maintain sensorimotor circuit integrity. *Nature* 509, 189–94.
- 24 46. Spiller, K.J., Cheung, C.J., Restrepo, C.R., Kwong, L.K., Stieber, A.M., Trojanowski,  
25 J.Q., and Lee, V.M.-Y. (2016). Selective Motor Neuron Resistance and Recovery in a  
26 New Inducible Mouse Model of TDP-43 Proteinopathy. *J Neurosci* 36, 7707–7717.
- 27 47. Nishizawa, T., Yamashita, S., McGrath, K.F., Tamaki, H., Kasuga, N., and Takekura,  
28 H. (2006). Plasticity of neuromuscular junction architectures in rat slow and fast  
29 muscle fibers following temporary denervation and reinnervation processes. *J Muscle*  
30 *Res Cell Motil* 27, 607–15.
- 31 48. Frey, D., Schneider, C., Xu, L., Borg, J., Spooren, W., and Caroni, P. (2000). Early and  
32 selective loss of neuromuscular synapse subtypes with low sprouting competence in  
33 motoneuron diseases. *J Neurosci* 20, 2534–42.
- 34 49. Schaefer, A.M., Sanes, J.R., and Lichtman, J.W. (2005). A compensatory  
35 subpopulation of motor neurons in a mouse model of amyotrophic lateral sclerosis. *J*  
36 *Comp Neurol* 490, 209–19.
- 37 50. Baloh, R.H., Rakowicz, W., Gardner, R., and Pestronk, A. (2007). Frequent atrophic  
38 groups with mixed-type myofibers is distinctive to motor neuron syndromes. *Muscle &*  
39 *nerve* 36, 107–10.
- 40 51. Jokela, M., Huovinen, S., Raheem, O., Lindfors, M., Palmio, J., Penttila, S., and Udd,  
41 B. (2016). Distinct Muscle Biopsy Findings in Genetically Defined Adult-Onset Motor  
42 Neuron Disorders. *PLoS one* 11, e0151376.
- 43 52. McCampbell, A., Cole, T., Wegener, A.J., Tomassy, G.S., Setnicka, A., Farley, B.J.,  
44 Schoch, K.M., Hoye, M.L., Shabsovich, M., Sun, L., et al. (2018). Antisense  
45 oligonucleotides extend survival and reverse decrement in muscle response in ALS  
46 models. *J Clin Invest* 128, 3558–3567.
- 47 53. Wen, H.L., Ting, C.H., Liu, H.C., Li, H., and Lin-Chao, S. (2013). Decreased stathmin  
48 expression ameliorates neuromuscular defects but fails to prolong survival in a mouse  
49 model of spinal muscular atrophy. *Neurobiol Dis* 52, 94–103.
- 50 54. Bellouze, S., Baillat, G., Buttigieg, D., de la Grange, P., Rabouille, C., and Haase, G.



- 1 (2016). Stathmin 1/2-triggered microtubule loss mediates Golgi fragmentation in  
2 mutant SOD1 motor neurons. *Mol Neurodegener* 11, 43.
- 3 55. Strey, C.W., Spellman, D., Stieber, A., Gonatas, J.O., Wang, X., Lambris, J.D., and  
4 Gonatas, N.K. (2004). Dysregulation of stathmin, a microtubule-destabilizing protein,  
5 and up-regulation of Hsp25, Hsp27, and the antioxidant peroxiredoxin 6 in a mouse  
6 model of familial amyotrophic lateral sclerosis. *Am J Pathol* 165, 1701–18.
- 7 56. Yadav, P., Selvaraj, B.T., Bender, F.L., Behringer, M., Moradi, M., Sivadasan, R.,  
8 Dombert, B., Blum, R., Asan, E., Sauer, M., et al. (2016). Neurofilament depletion  
9 improves microtubule dynamics via modulation of Stat3/stathmin signaling. *Acta*  
10 *Neuropathol* 132, 93–110.
- 11 57. Klim, J.R., Williams, L.A., Limone, F., Juan, I.G.S., Davis-Dusenbery, B.N., Mordes,  
12 D.A., Burberry, A., Steinbaugh, M.J., Gamage, K.K., Kirchner, R., et al. (2019). ALS-  
13 implicated protein TDP-43 sustains levels of STMN2, a mediator of motor neuron  
14 growth and repair. *Nat Neurosci* 22, 167–179.
- 15 58. Melamed, Z., López-Erauskin, J., Baughn, M.W., Zhang, O., Drenner, K., Sun, Y.,  
16 Freyermuth, F., McMahon, M.A., Beccari, M.S., Artates, J.W., et al. (2019). Premature  
17 polyadenylation-mediated loss of stathmin-2 is a hallmark of TDP-43-dependent  
18 neurodegeneration. *Nat Neurosci* 22, 180–190.
- 19 59. Karch, C.M., Wen, N., Fan, C.C., Yokoyama, J.S., Kouri, N., Ross, O.A., Höglinger,  
20 G., Müller, U., Ferrari, R., Hardy, J., et al. (2018). Selective Genetic Overlap Between  
21 Amyotrophic Lateral Sclerosis and Diseases of the Frontotemporal Dementia  
22 Spectrum. *JAMA Neurol* 75, 860–875.
- 23 60. Sundar, P.D., Yu, C.-E., Sieh, W., Steinbart, E., Garruto, R.M., Oyanagi, K., Craig, U.-  
24 K., Bird, T.D., Wijsman, E.M., Galasko, D.R., et al. (2007). Two sites in the MAPT  
25 region confer genetic risk for Guam ALS/PDC and dementia. *Hum Mol Genet* 16, 295–  
26 306.
- 27 61. Baas, P.W., and Qiang, L. (2019). Tau: It's Not What You Think. *Trends Cell Biol* 29,  
28 452–461.
- 29 62. Qiang, L., Sun, X., Austin, T.O., Muralidharan, H., Jean, D.C., Liu, M., Yu, W., and  
30 Baas, P.W. (2018). Tau Does Not Stabilize Axonal Microtubules but Rather Enables  
31 Them to Have Long Labile Domains. *Curr Biol* 28, 2181-2189.e4.
- 32 63. Kevenaar, J.T., Bianchi, S., van Spronsen, M., Olieric, N., Lipka, J., Frias, C.P.,  
33 Mikhaylova, M., Harterink, M., Keijzer, N., Wulf, P.S., et al. (2016). Kinesin-Binding  
34 Protein Controls Microtubule Dynamics and Cargo Trafficking by Regulating Kinesin  
35 Motor Activity. *Curr Biol* 26, 849–861.
- 36 64. Wei, D., Gao, N., Li, L., Zhu, J.-X., Diao, L., Huang, J., Han, Q.-J., Wang, S., Xue, H.,  
37 Wang, Q., et al. (2018).  $\alpha$ -Tubulin Acetylation Restricts Axon Overbranching by  
38 Dampening Microtubule Plus-End Dynamics in Neurons. *Cereb Cortex* 28, 3332–  
39 3346.
- 40 65. Kalebic, N., Martinez, C., Perlas, E., Hublitz, P., Bilbao-Cortes, D., Fiedorczuk, K.,  
41 Andolfo, A., and Heppenstall, P.A. (2013). Tubulin Acetyltransferase  $\alpha$ TAT1  
42 Destabilizes Microtubules Independently of Its Acetylation Activity. *Mol Cell Biol* 33,  
43 1114–1123.
- 44 66. Seidah, N.G., Benjannet, S., Pareek, S., Chrétien, M., and Murphy, R.A. (1996).  
45 Cellular processing of the neurotrophin precursors of NT3 and BDNF by the  
46 mammalian proprotein convertases. *FEBS Lett* 379, 247–250.
- 47 67. Martin, M. (2011). Cutadapt removes adapter sequences from high-throughput  
48 sequencing reads. *EMBnet.journal* 17, 10–12.
- 49 68. Davis, M.P.A., van Dongen, S., Abreu-Goodger, C., Bartonicek, N., and Enright, A.J.  
50 (2013). Kraken: A set of tools for quality control and analysis of high-throughput

- 1 sequence data. *Methods* 63, 41–49.
- 2 69. Dobin, A., Davis, C.A., Schlesinger, F., Drenkow, J., Zaleski, C., Jha, S., Batut, P.,
- 3 Chaisson, M., and Gingeras, T.R. (2013). STAR: ultrafast universal RNA-seq aligner.
- 4 *Bioinformatics* 29, 15–21.
- 5 70. Anders, S., Pyl, P.T., and Huber, W. (2015). HTSeq—a Python framework to work with
- 6 high-throughput sequencing data. *Bioinformatics* 31, 166–169.
- 7 71. Wang, L., Wang, S., and Li, W. (2012). RSeQC: quality control of RNA-seq
- 8 experiments. *Bioinformatics* 28, 2184–2185.
- 9 72. Li, B., and Dewey, C.N. (2011). RSEM: accurate transcript quantification from RNA-
- 10 Seq data with or without a reference genome. *BMC Bioinformatics* 12, 323.
- 11 73. Love, M.I., Huber, W., and Anders, S. (2014). Moderated estimation of fold change
- 12 and dispersion for RNA-seq data with DESeq2. *Genome Biol.* 15, 550.
- 13

1 **Figure legends**

2 **Figure 1. AAV-miR SOD1 targeting of astrocytes preserves neuromuscular function.**

3 Neuromuscular function is assessed by electromyography and behavioral testing. (a) Schema of  
4 the longitudinal experiment indicating the analysis time points. (b) Amplitude of the evoked  
5 compound muscle action potential (CMAP) recorded in the *triceps surae*. Note the rapid decrease  
6 of CMAP amplitude in the untreated and AAV-miR ctrl injected *SOD1<sup>G93A</sup>* mice between day 45  
7 and 66. There is a progressive rescue of CMAP values in the AAV-miR SOD1 treated group, from  
8 day 73 onwards. (c) The grid test is used to evaluate the strength of the four limbs. Note the  
9 marked decrease of the score in the untreated and AAV-miR ctrl injected *SOD1<sup>G93A</sup>* mice, from  
10 day 86 on. A significant rescue of muscle strength is observed in the AAV-miR SOD1-treated  
11 mice. Statistical analysis for b and c: two-way ANOVA (group x time) repeated measures with  
12 Bonferroni *post-hoc* test; \*\*\* $P < 0.001$ . (d) Motor coordination is measured in the Rotarod test.  
13 Note the progressive loss of performance in ALS mice, starting at day 75. AAV-miR SOD1  
14 induces a late improvement of the motor coordination, from day 117 on. Statistical analysis: one-  
15 way ANOVA with Newman-Keuls *post-hoc* test; \* $P < 0.05$ , \*\* $P < 0.01$ . Data represent mean  $\pm$   
16 SEM.  $n = 12$  mice per group.

17

18 **Figure 2. AAV-miR SOD1 targeting of astrocytes has protective effects on fast-fatigable**  
19 **motoneurons in the lumbar spinal cord.**

20 (a) Representative pictures of ChAT+ MN (red arrows) in the lumbar spinal cord at end stage. (b)  
21 Quantification of the number of ChAT+ MN per section of the lumbar spinal cord, from 65 days of  
22 age until end stage. Note the significant MN protection in the AAV-miR SOD1 group at end stage.  
23 For comparison, the grey bar shows the average number of ChAT+ MN per section in adult WT  
24 mice (older than 140 days). (c) Representative pictures of FF MN highly immunoreactive for MMP9  
25 (white arrows) at end stage. (d) Average number of FF MN per section identified by high MMP9  
26 immunoreactivity. There is a significant loss of MMP9+ MN per section in *SOD1<sup>G93A</sup>* mice from day  
27 100 on. Note the significant protection of MMP9+ MN in the AAV-miR SOD1 treated mice at end

1 stage. For comparison, the grey bar shows the average number of MMP9+ MN per section in adult  
2 WT mice (older than 65 days). Data represent mean  $\pm$  SEM. The numbers of replicates per group  
3 are indicated in each bar. Statistical analysis: one-way ANOVA with Bonferroni *post-hoc* test; \* $P$  <  
4 0.05, \*\* $P$  < 0.01, \*\*\* $P$  < 0.001. Scale bars: 50  $\mu$ m.

5

6 **Figure 3. The occupancy of the neuromuscular junctions is rescued in the *gastrocnemius***  
7 **muscle of *SOD1*<sup>G93A</sup> mice treated with AAV-miR SOD1.**

8 Analysis of the innervation of motor endplates in the *gastrocnemius* muscle. (a) Immunostaining  
9 for SV2 (synaptic marker) and  $\alpha$ -bungarotoxin labeling of the motor endplate showing a fully  
10 innervated NMJ (\*, markers are fully colocalized), a partially innervated NMJ (arrowhead) and an  
11 unoccupied motor endplate (arrow). (b) Quantification of the percentage of fully innervated NMJ in  
12 the *gastrocnemius* muscle. At day 65, NMJ occupancy is significantly decreased in all groups of  
13 *SOD1*<sup>G93A</sup> mice. Note the significant rescue of NMJ occupancy at days 100, 140 and end stage in  
14 the *gastrocnemius* muscle of AAV-miR SOD1-treated *SOD1*<sup>G93A</sup> mice, as compared to the  
15 continuous decrease observed in the AAV-miR ctrl-injected and untreated mice. Data represent  
16 mean  $\pm$  SEM. The number of replicates is indicated in each bar. The grey bar shows the average  
17 NMJ occupancy in adult WT mice (older than P65). Statistical analysis: one-way ANOVA with  
18 Bonferroni *post-hoc* test; \* $P$  < 0.05, \*\* $P$  < 0.01, \*\*\* $P$  < 0.001. Scale bar 75  $\mu$ m.

19

20 **Figure 4. AAV miR SOD1 treatment protects against the loss of type IIb muscle fibers.**

21 (a) Representative images of transversal sections of the *triceps surae* muscle in WT, AAV-miR  
22 SOD1 treated and untreated ALS mice at end stage. Sections were co-immunostained for three  
23 MyHC isoforms: isoform IIb (red) shows type IIB fibers forming fast-twitch fast-fatigable motor  
24 units; isoform IIa (green) shows type IIA fibers forming fast-twitch fatigue-resistant motor units;  
25 isoform I (green) shows type I fibers forming slow-twitch motor units. Note the lack of muscle  
26 atrophy in the *SOD1*<sup>G93A</sup> mice treated with AAV-miR SOD1, as compared to untreated ALS mice.  
27 Scale bar: 300  $\mu$ m. (b) Dystrophin staining (left panel) delineates individual muscle fibers, the type  
28 of which is determined according to co-immunostaining for MyHC isoform (right panel). Fibers

1 negative for all three MyHC isoforms are defined as type IIX (arrowhead). Scale bar: 300  $\mu$ m. (c)  
2 Quantitative analysis of the total number of fibers in the *gastrocnemius* and *plantaris* muscles at  
3 end stage. Note the significant protection against muscle fiber loss in the *SOD1*<sup>G93A</sup> mice treated  
4 with AAV-miR SOD. (d) Number of muscle fibers for each fiber type. (e) Mean area of individual  
5 muscle fibers, according to fiber type. Note the significant protection of the number and size of  
6 type IIb muscle fibers in AAV-miR SOD1 treated *SOD1*<sup>G93A</sup> mice. Data represent mean  $\pm$  SD;  $n =$   
7 5 for all conditions, except WT mice ( $n = 4$ ). Statistical analysis: one-way ANOVA with Bonferroni  
8 *post-hoc* test; n.s. not significant, \* $P < 0.05$ , \*\* $P < 0.01$ , \*\*\* $P < 0.001$ .

9

10 **Figure 5. Axonal sprouting and fiber type grouping in the *triceps surae* of AAV-miR SOD1-**  
11 **treated *SOD1*<sup>G93A</sup> mice.**

12 (a) Representative photomicrograph of NMJ stained with  $\alpha$ -bungarotoxin (white), SV2 (red) and  
13 NFM-145 (green) in the *gastrocnemius* muscle of an AAV-miR SOD1 treated *SOD1*<sup>G93A</sup> mouse at  
14 day 100. The co-localization of SV2 and  $\alpha$ -bungarotoxin indicates complete endplate innervation  
15 in all NMJ (\*). The arrows show a NFM-145-positive axon extending beyond the motor endplate,  
16 which is considered as a terminal sprouting event. Scale bar: 75 $\mu$ m. (b) Transversal sections of  
17 the *triceps surae* muscle stained for type IIa and type I MyHC to reveal the distribution of muscle  
18 fiber types in a WT and an AAV-miR SOD1-treated *SOD1*<sup>G93A</sup> mouse. Note the grouping of type  
19 IIA and type I muscle fibers in the treated ALS mouse (right panels), particularly evident in the  
20 *plantaris* (*pl*, dotted line) and *soleus* (*so*, solid line) muscles. Scale bar: 1 mm. (c) Quantification of  
21 the average minimal distance between fibers from the same type. A reduced distance is indicative  
22 of fiber type grouping. (d) Quantification of the percentage of fibers in direct contact with another  
23 fiber from the same type. Note that for both parameters, there is a significant increase of the  
24 clustering for all the fiber types analyzed in the AAV-miR SOD1 treated *SOD1*<sup>G93A</sup> mice. Data  
25 represent mean  $\pm$  SD;  $n = 4$  WT mice and  $n = 5$  AAV-miR SOD1-treated *SOD1*<sup>G93A</sup> mice.  
26 Statistical analysis: two-tailed unpaired Student's *t* test; \* $P < 0.05$ , \*\* $P < 0.01$ .

27

1 **Figure 6: Differentially expressed genes in spinal cord motoneurons of  $SOD1^{G93A}$  mice**  
2 **following AAV-miR SOD1 targeting of astrocytes.**

3 A multi-factorial statistical model with DESeq2 is used to identify 95 genes differentially expressed  
4 in MN of AAV-miR SOD1  $SOD1^{G93A}$  treated mice ( $n = 4$ ) as compared to AAV-miR ctrl ( $n = 5$ ) and  
5 non-injected  $SOD1^{G93A}$  mice ( $n = 4$ ). **(a)** Genes with expression changes at a false discovery rate  
6 (FDR)  $\leq 10\%$  are shown in the hierarchical clustering dendrogram. **(b)** Histogram plots showing  
7 differences in mRNA expression for individual genes either regulating microtubule stability or  
8 related to MN plasticity. Data represent mean  $\pm$  SEM. Statistical analysis: FDR adjusted  $P$  value:  
9 #  $P_{adj} < 0.1$ , ##  $P_{adj} < 0.2$ ; one-way ANOVA: \* $P < 0.05$ , \*\* $P < 0.01$ , \*\*\* $P < 0.001$ .

Figure 1

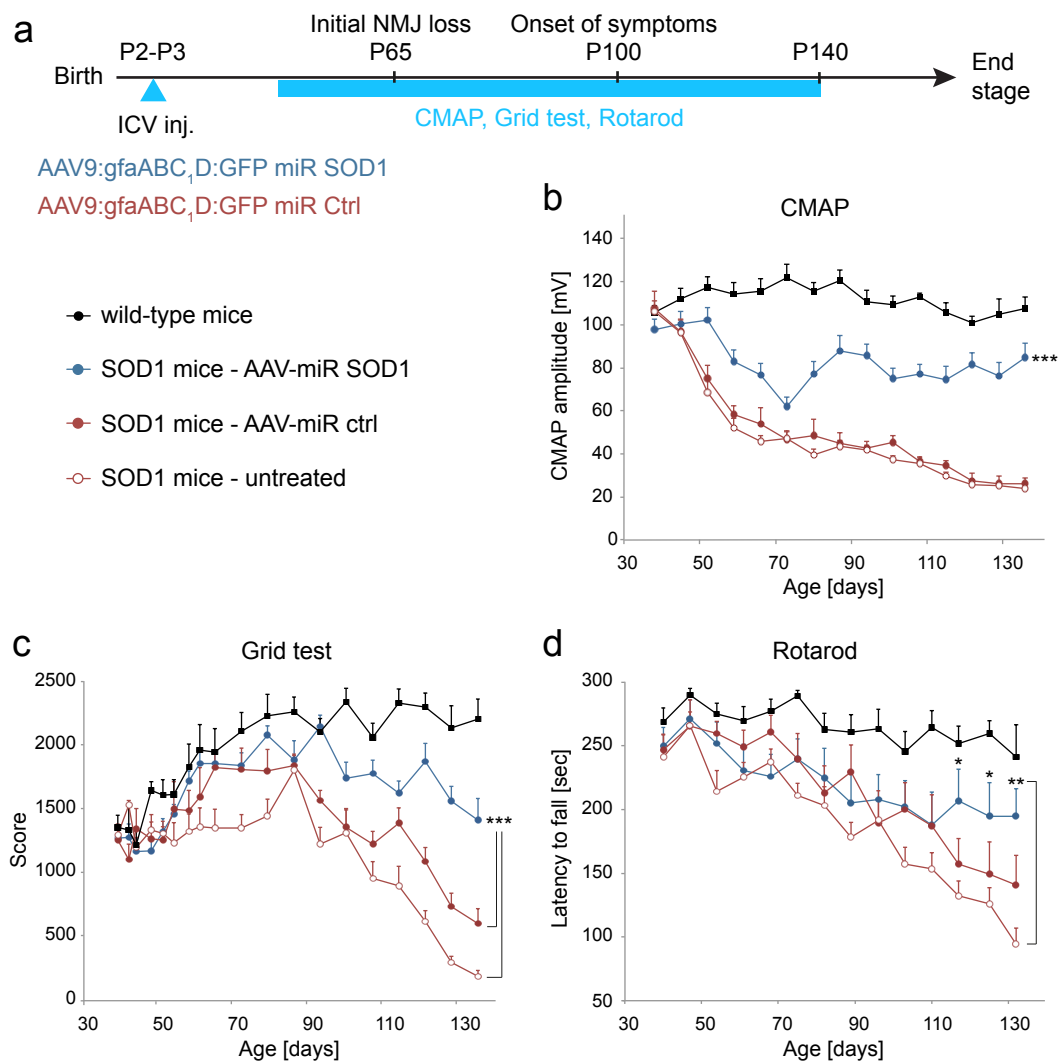

Figure 2

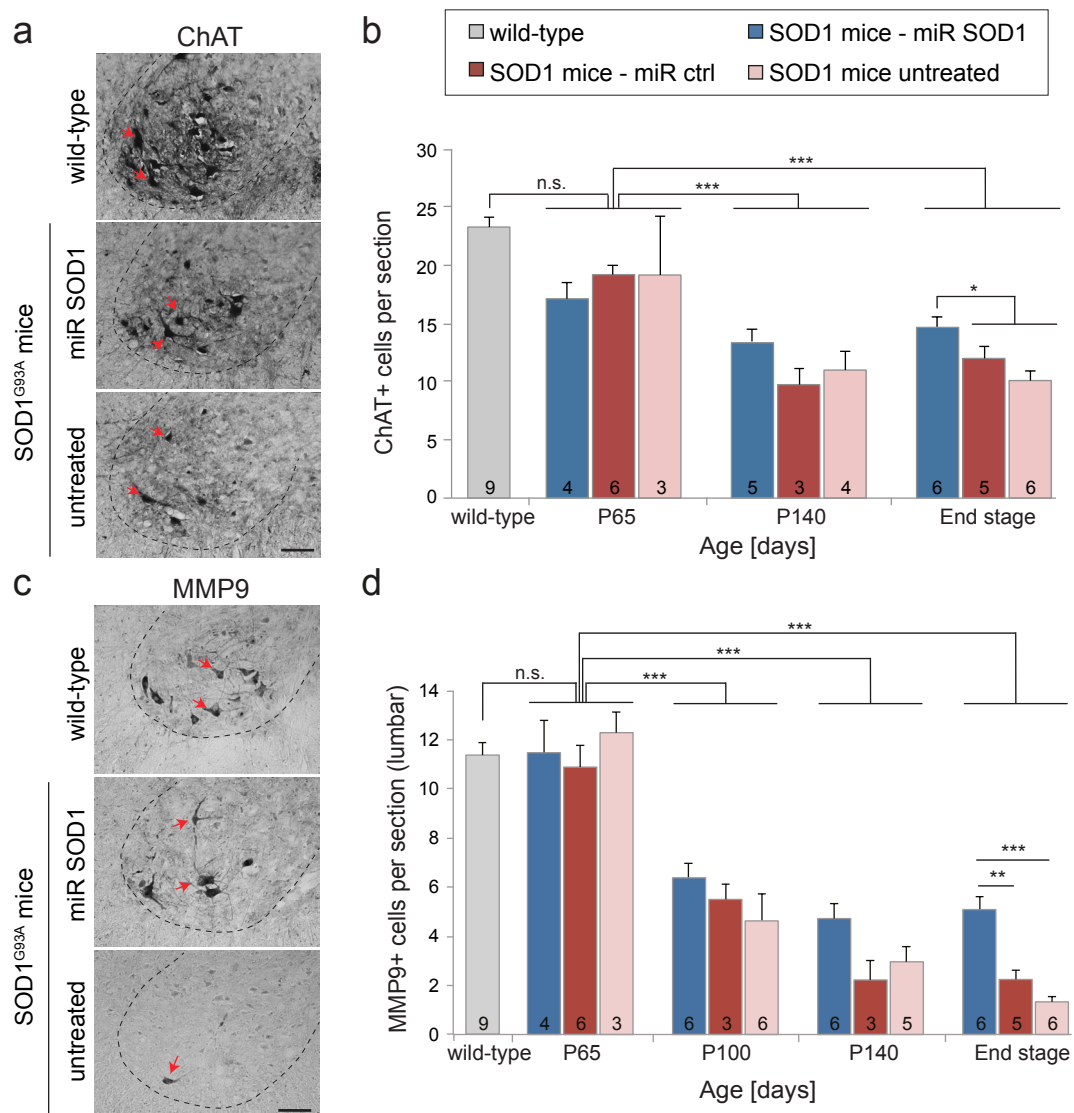



Figure 3

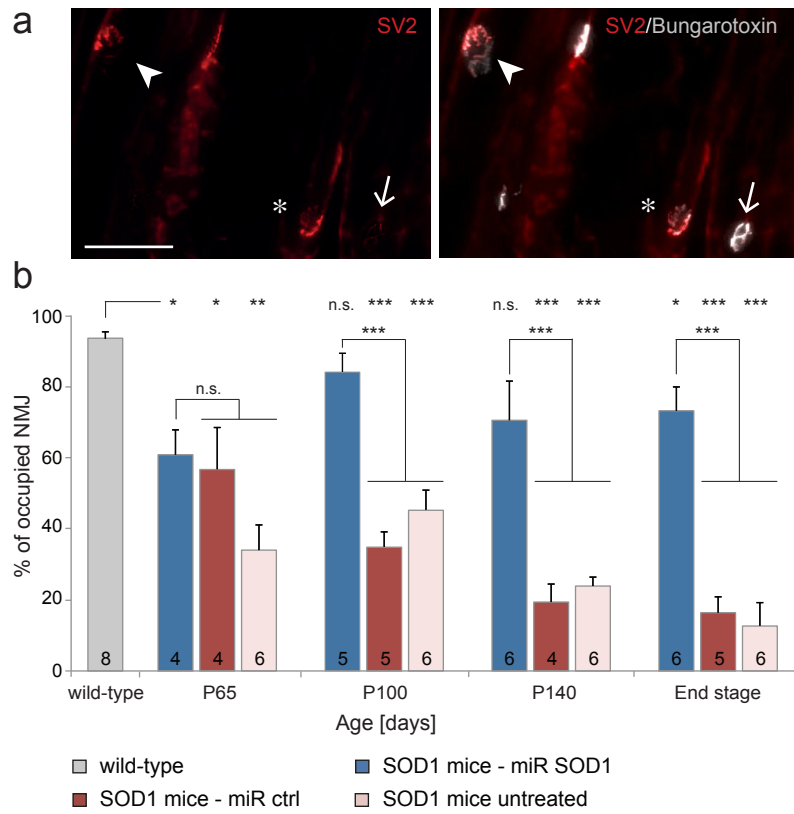

Figure 4

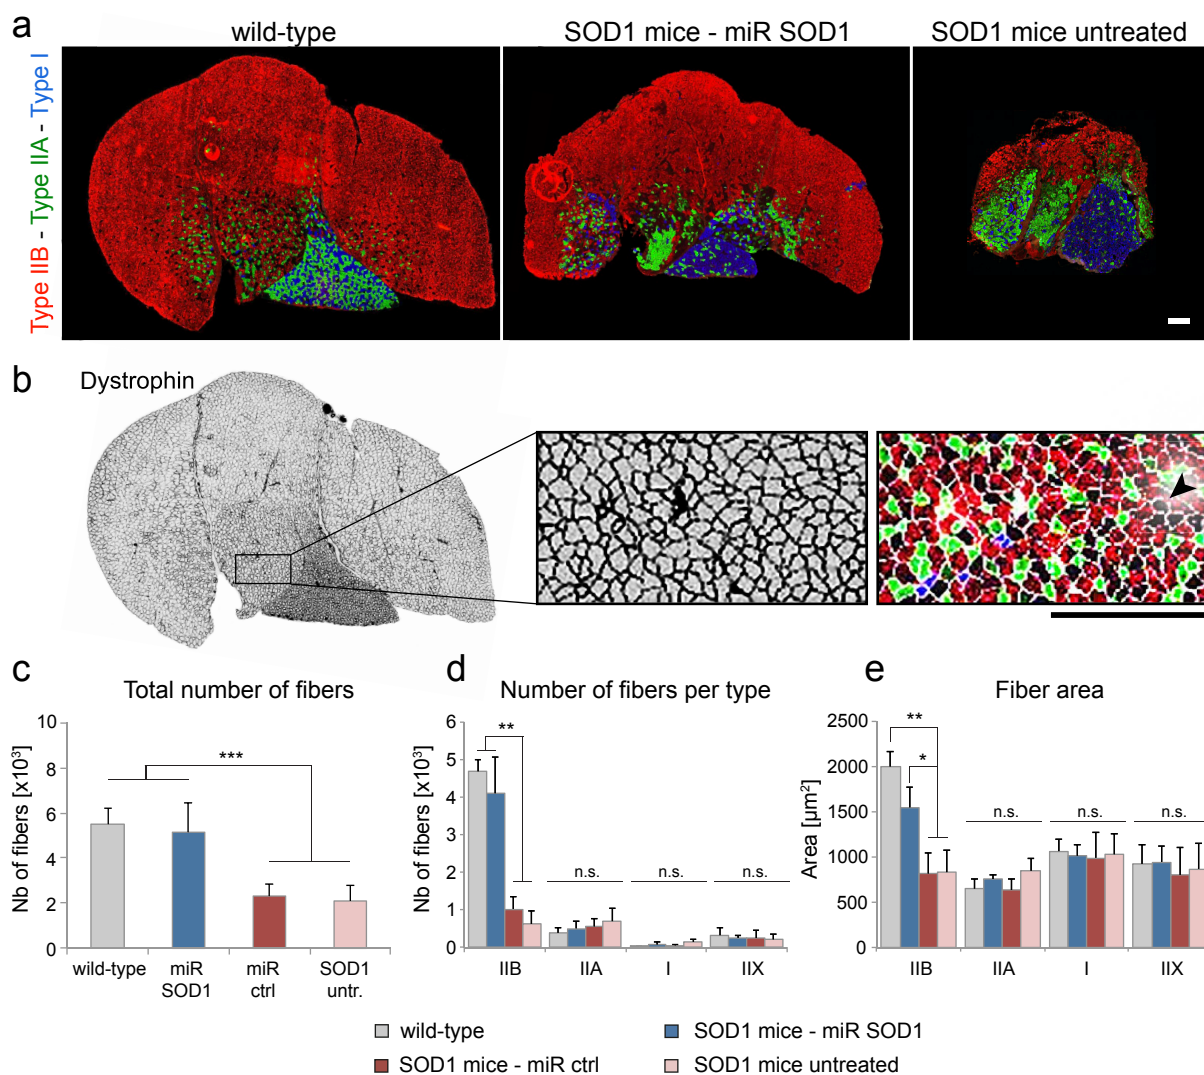

Figure 5

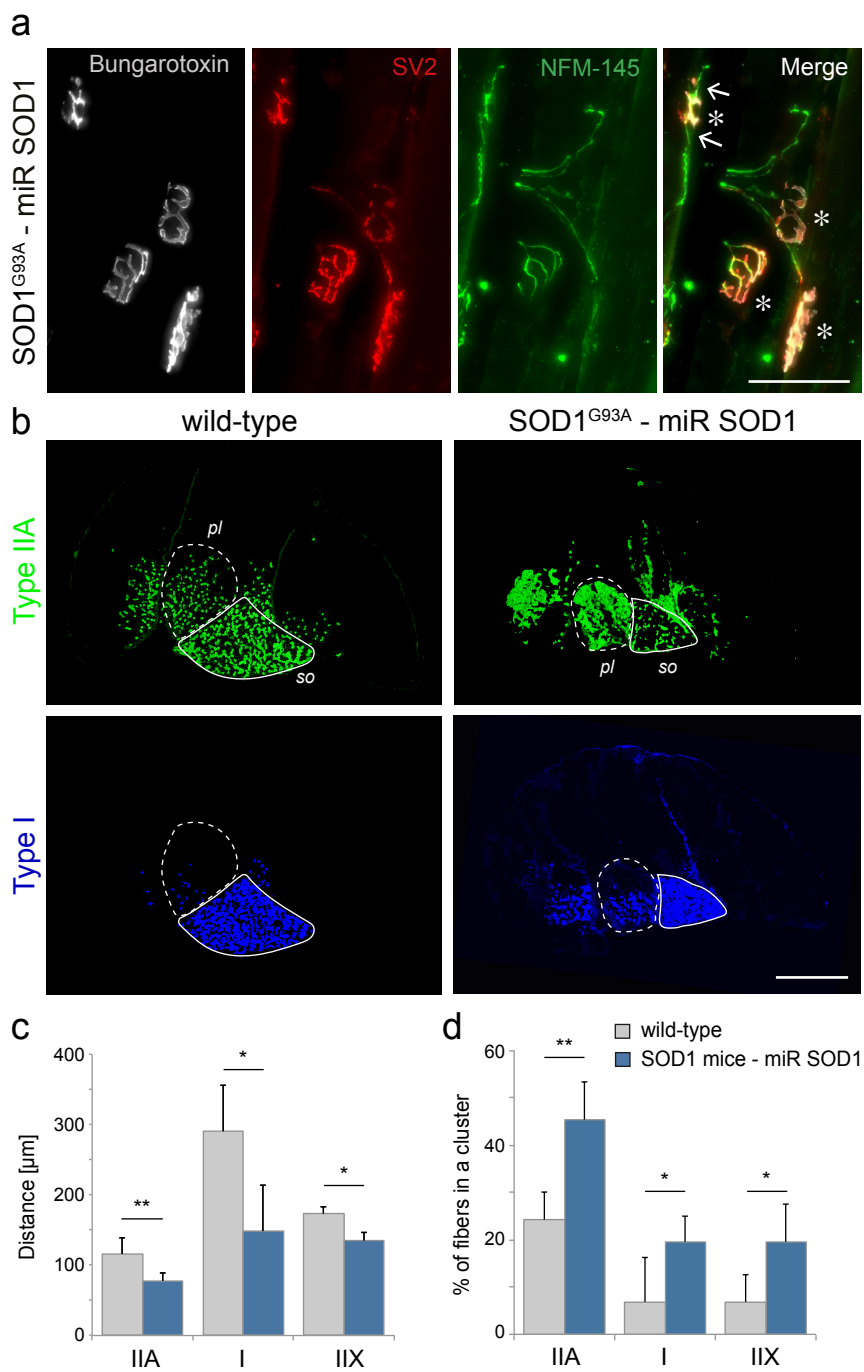

## Figure 6

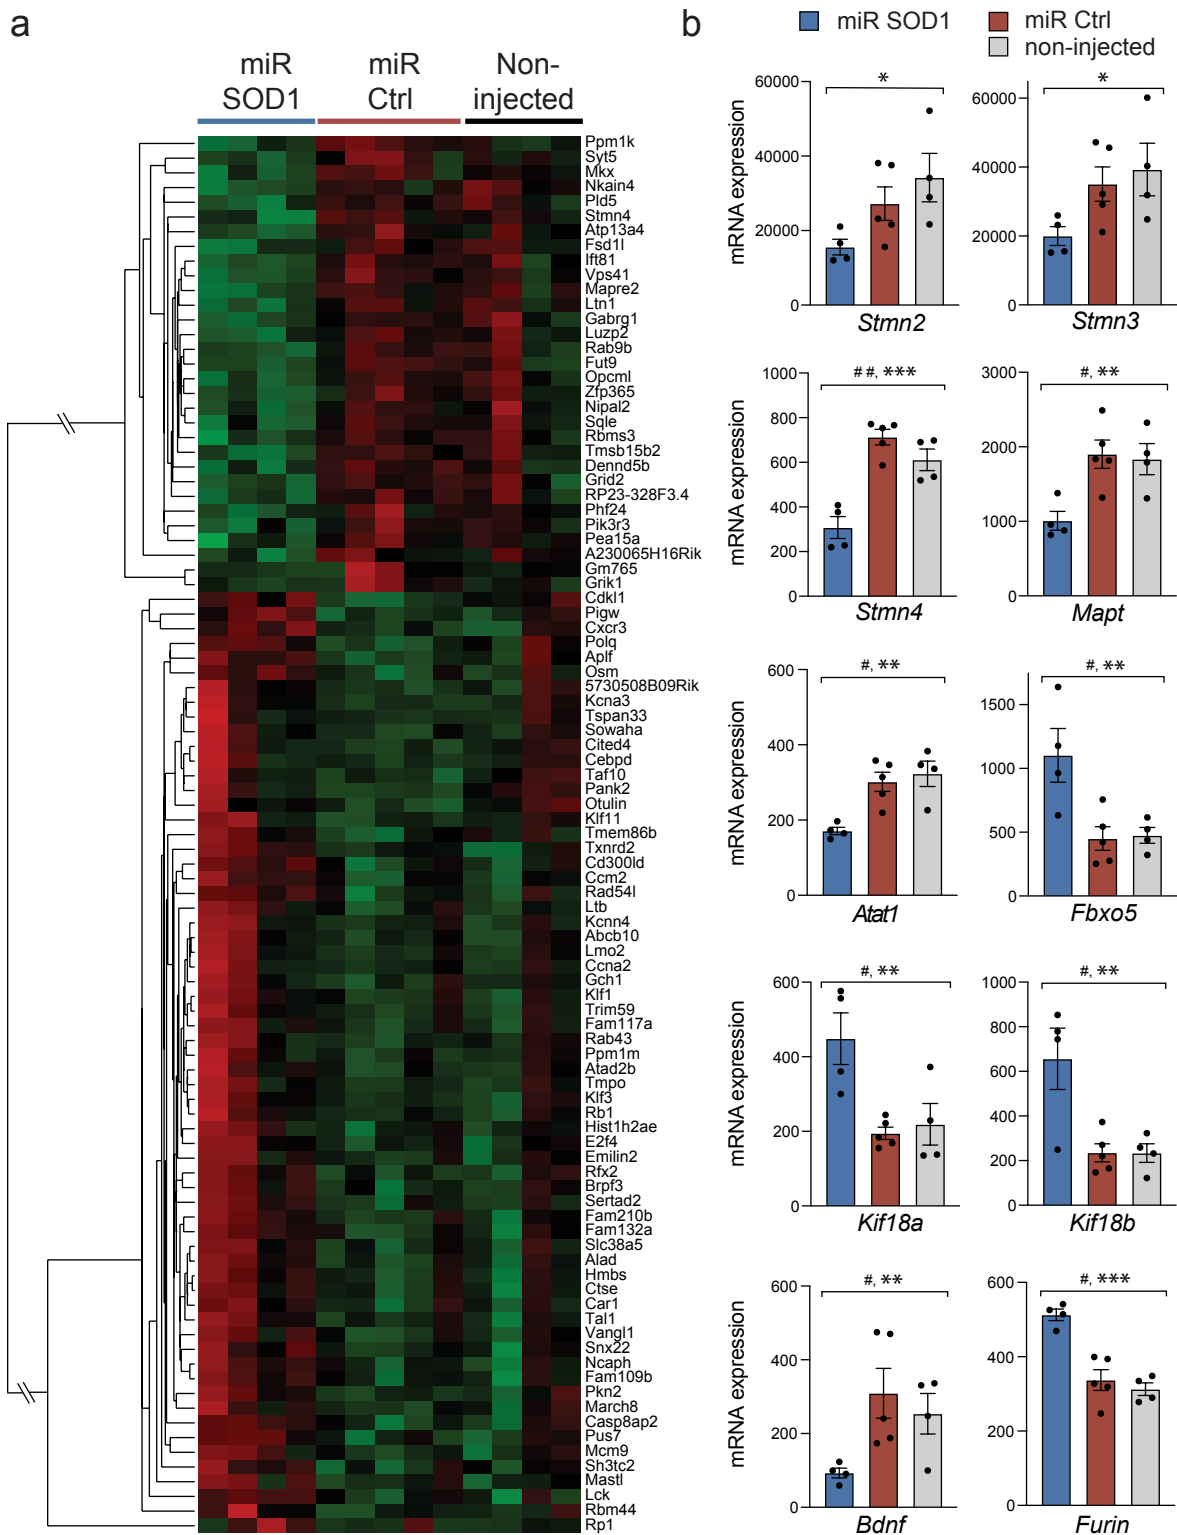

Source: https://www.biorxiv.org/content/10.1101/2021.01.08.425706v1.full.pdf
